# Supplementary material for: Shared HLA Class II in Six Autoimmune Diseases in Latin America: A Meta-Analysis
Source: Autoimmune Dis. 2012 Apr 19;2012:569728. doi: 10.1155/2012/569728 (PMC3345213; doi:10.1155/2012/569728)
Supplement: Supplementary file 1 — Supplementary Table 1: Detailed search of antibodies prevalence in the RA, SLE, AIH, T1D and SS Supplementary Table 2: Prevalence of the the sharing of autoantibodies in RA, SLE, AIH, T1D and SS [file 569728.f1.xls]

## Sheet: Supplementary Table 1
Supplementary Table 1. Detailed search of antibodies prevalence in the RA, SLE, AIH, T1D and SS
Search No.	Autoimmune Disease	Antibody	Pubmed Search
1	"Sjogren's Syndrome"[Mesh]	antinuclear antibodies	(("Sjogren's Syndrome"[Mesh]) AND antinuclear antibodies)
2	"Sjogren's Syndrome"[Mesh]	antinuclear antibody	(("Sjogren's Syndrome"[Mesh]) AND antinuclear antibody)
3	"Sjogren's Syndrome"[Mesh]	ANA	(("Sjogren's Syndrome"[Mesh]) AND ANA)
4	"Sjogren's Syndrome"[Mesh]	anti-dna	(("Sjogren's Syndrome"[Mesh]) AND anti-dna)
5	"Sjogren's Syndrome"[Mesh]	anti-dna antibodies	(("Sjogren's Syndrome"[Mesh]) AND anti-dna antibodies)
6	"Sjogren's Syndrome"[Mesh]	anti dsdna	(("Sjogren's Syndrome"[Mesh]) AND anti dsdna)
7	"Sjogren's Syndrome"[Mesh]	Anti-ds DNA	(("Sjogren's Syndrome"[Mesh]) AND Anti-ds DNA )
8	"Sjogren's Syndrome"[Mesh]	anti double stranded DNA	(("Sjogren's Syndrome"[Mesh]) AND anti double stranded DNA)
9	"Sjogren's Syndrome"[Mesh]	Anti RNP	(("Sjogren's Syndrome"[Mesh]) AND Anti RNP)
10	"Sjogren's Syndrome"[Mesh]	anti-rnp	(("Sjogren's Syndrome"[Mesh]) AND anti-rnp)
11	"Sjogren's Syndrome"[Mesh]	anti-rnp antibodies	(("Sjogren's Syndrome"[Mesh]) AND anti-rnp antibodies)
12	"Sjogren's Syndrome"[Mesh]	anti-sm	(("Sjogren's Syndrome"[Mesh]) AND anti-sm)
13	"Sjogren's Syndrome"[Mesh]	anti-sm antibodies	(("Sjogren's Syndrome"[Mesh]) AND anti-sm antibodies)
14	"Sjogren's Syndrome"[Mesh]	Anti-Ro	(("Sjogren's Syndrome"[Mesh]) AND Anti-Ro)
15	"Sjogren's Syndrome"[Mesh]	anti ro antibodies	(("Sjogren's Syndrome"[Mesh]) AND anti ro antibodies)
16	"Sjogren's Syndrome"[Mesh]	anti ro ssa	(("Sjogren's Syndrome"[Mesh]) AND anti ro ssa)
17	"Sjogren's Syndrome"[Mesh]	anti ro antibody	(("Sjogren's Syndrome"[Mesh]) AND anti ro antibody)
18	"Sjogren's Syndrome"[Mesh]	anti ss-a	(("Sjogren's Syndrome"[Mesh]) AND anti ss-a)
19	"Sjogren's Syndrome"[Mesh]	anti ss-a antibody	(("Sjogren's Syndrome"[Mesh]) AND anti ss-a antibody)
20	"Sjogren's Syndrome"[Mesh]	anti ro	(("Sjogren's Syndrome"[Mesh]) AND anti ro)
21	"Sjogren's Syndrome"[Mesh]	anti ro la	(("Sjogren's Syndrome"[Mesh]) AND anti ro la)
22	"Sjogren's Syndrome"[Mesh]	Anti-La	(("Sjogren's Syndrome"[Mesh]) AND Anti-La)
23	"Sjogren's Syndrome"[Mesh]	ssb antibody	(("Sjogren's Syndrome"[Mesh]) AND ssb antibody)
24	"Sjogren's Syndrome"[Mesh]	lupus anticoagulant	(("Sjogren's Syndrome"[Mesh]) AND lupus anticoagulant)
25	"Sjogren's Syndrome"[Mesh]	Antibodies, Anticardiolipin IgG	(("Sjogren's Syndrome"[Mesh]) AND Antibodies, Anticardiolipin IgG)
26	"Sjogren's Syndrome"[Mesh]	IgG aCL	(("Sjogren's Syndrome"[Mesh]) AND IgG aCL)
27	"Sjogren's Syndrome"[Mesh]	Antibodies, Anticardiolipin IgM	(("Sjogren's Syndrome"[Mesh]) AND Antibodies, Anticardiolipin IgM)
28	"Sjogren's Syndrome"[Mesh]	IgM aCL	(("Sjogren's Syndrome"[Mesh]) AND IgM aCL)
29	"Sjogren's Syndrome"[Mesh]	anti-beta2 glycoprotein	(("Sjogren's Syndrome"[Mesh]) AND anti-beta2 glycoprotein)
30	"Sjogren's Syndrome"[Mesh]	Anti-β2GP1	(("Sjogren's Syndrome"[Mesh]) AND Anti-β2GP1)
31	"Sjogren's Syndrome"[Mesh]	rheumatoid factor	(("Sjogren's Syndrome"[Mesh]) AND rheumatoid factor)
32	"Sjogren's Syndrome"[Mesh]	anti ccp antibodies	(("Sjogren's Syndrome"[Mesh]) AND anti ccp antibodies)
33	"Sjogren's Syndrome"[Mesh]	Anti CCP	(("Sjogren's Syndrome"[Mesh]) AND Anti CCP)
34	"Sjogren's Syndrome"[Mesh]	anti-gad	(("Sjogren's Syndrome"[Mesh]) AND anti-gad)
35	"Sjogren's Syndrome"[Mesh]	anti-gad antibody	(("Sjogren's Syndrome"[Mesh]) AND anti-gad antibody)
36	"Sjogren's Syndrome"[Mesh]	anti gad antibodies	(("Sjogren's Syndrome"[Mesh]) AND anti gad antibodies)
37	"Sjogren's Syndrome"[Mesh]	anti gad	(("Sjogren's Syndrome"[Mesh]) AND anti gad)
38	"Sjogren's Syndrome"[Mesh]	ICA	(("Sjogren's Syndrome"[Mesh]) AND ICA)
39	"Sjogren's Syndrome"[Mesh]	Insulin Antibodies	(("Sjogren's Syndrome"[Mesh]) AND Insulin Antibodies)
40	"Sjogren's Syndrome"[Mesh]	Anti-insulin	(("Sjogren's Syndrome"[Mesh]) AND Anti-insulin)
41	"Sjogren's Syndrome"[Mesh]	Anti-insulin antibody	(("Sjogren's Syndrome"[Mesh]) AND Anti-insulin antibody)
42	"Sjogren's Syndrome"[Mesh]	ia 2 antibody	(("Sjogren's Syndrome"[Mesh]) AND ia 2 antibody)
43	"Sjogren's Syndrome"[Mesh]	antimitochondrial antibodies	(("Sjogren's Syndrome"[Mesh]) AND antimitochondrial antibodies)
44	"Sjogren's Syndrome"[Mesh]	antimitochondrial antibody	(("Sjogren's Syndrome"[Mesh]) AND antimitochondrial antibody)
45	"Sjogren's Syndrome"[Mesh]	AMA	(("Sjogren's Syndrome"[Mesh]) AND AMA)
46	"Sjogren's Syndrome"[Mesh]	ASMA	(("Sjogren's Syndrome"[Mesh]) AND ASMA )
47	"Sjogren's Syndrome"[Mesh]	smooth muscle antibodies	(("Sjogren's Syndrome"[Mesh]) AND smooth muscle antibodies)
48	"Sjogren's Syndrome"[Mesh]	anti smooth muscle antibodies	(("Sjogren's Syndrome"[Mesh]) AND anti smooth muscle antibodies)
49	"Sjogren's Syndrome"[Mesh]	anti-smooth muscle antibodies	(("Sjogren's Syndrome"[Mesh]) AND anti-smooth muscle antibodies)
50	"Sjogren's Syndrome"[Mesh]	anti smooth muscle antibody	(("Sjogren's Syndrome"[Mesh]) AND anti smooth muscle antibody)
51	"Sjogren's Syndrome"[Mesh]	anti thyroglobulin	(("Sjogren's Syndrome"[Mesh]) AND anti thyroglobulin)
52	"Sjogren's Syndrome"[Mesh]	Anti thyroid	(("Sjogren's Syndrome"[Mesh]) AND Anti thyroid )
53	"Sjogren's Syndrome"[Mesh]	Anti thyroid antibodies	(("Sjogren's Syndrome"[Mesh]) AND Anti thyroid antibodies)
54	"Sjogren's Syndrome"[Mesh]	Anti thyroid peroxidase	(("Sjogren's Syndrome"[Mesh]) AND Anti thyroid peroxidase)
55	"Sjogren's Syndrome"[Mesh]	Anti-Tg	(("Sjogren's Syndrome"[Mesh]) AND Anti-Tg)
56	"Sjogren's Syndrome"[Mesh]	thyroperoxidase antibody	(("Sjogren's Syndrome"[Mesh]) AND thyroperoxidase antibody)
57	"Sjogren's Syndrome"[Mesh]	tpo antibodies	(("Sjogren's Syndrome"[Mesh]) AND tpo antibodies)
58	"Sjogren's Syndrome"[Mesh]	anti tpo	(("Sjogren's Syndrome"[Mesh]) AND anti tpo)
59	"Sjogren's Syndrome"[Mesh]	Anti-TPO	(("Sjogren's Syndrome"[Mesh]) AND Anti-TPO)
60	"Diabetes Mellitus, Type 1"[Mesh]	antinuclear antibodies	(("Diabetes Mellitus, Type 1"[Mesh]) AND antinuclear antibodies)
61	"Diabetes Mellitus, Type 1"[Mesh]	antinuclear antibody	(("Diabetes Mellitus, Type 1"[Mesh]) AND antinuclear antibody)
62	"Diabetes Mellitus, Type 1"[Mesh]	ANA	(("Diabetes Mellitus, Type 1"[Mesh]) AND ANA)
63	"Diabetes Mellitus, Type 1"[Mesh]	anti-dna	(("Diabetes Mellitus, Type 1"[Mesh]) AND anti-dna)
64	"Diabetes Mellitus, Type 1"[Mesh]	anti-dna antibodies	(("Diabetes Mellitus, Type 1"[Mesh]) AND anti-dna antibodies)
65	"Diabetes Mellitus, Type 1"[Mesh]	anti dsdna	(("Diabetes Mellitus, Type 1"[Mesh]) AND anti dsdna)
66	"Diabetes Mellitus, Type 1"[Mesh]	Anti-ds DNA	(("Diabetes Mellitus, Type 1"[Mesh]) AND Anti-ds DNA )
67	"Diabetes Mellitus, Type 1"[Mesh]	anti double stranded DNA	(("Diabetes Mellitus, Type 1"[Mesh]) AND anti double stranded DNA)
68	"Diabetes Mellitus, Type 1"[Mesh]	Anti RNP	(("Diabetes Mellitus, Type 1"[Mesh]) AND Anti RNP)
69	"Diabetes Mellitus, Type 1"[Mesh]	anti-rnp	(("Diabetes Mellitus, Type 1"[Mesh]) AND anti-rnp)
70	"Diabetes Mellitus, Type 1"[Mesh]	anti-rnp antibodies	(("Diabetes Mellitus, Type 1"[Mesh]) AND anti-rnp antibodies)
71	"Diabetes Mellitus, Type 1"[Mesh]	anti-sm	(("Diabetes Mellitus, Type 1"[Mesh]) AND anti-sm)
72	"Diabetes Mellitus, Type 1"[Mesh]	anti-sm antibodies	(("Diabetes Mellitus, Type 1"[Mesh]) AND anti-sm antibodies)
73	"Diabetes Mellitus, Type 1"[Mesh]	Anti-Ro	(("Diabetes Mellitus, Type 1"[Mesh]) AND Anti-Ro)
74	"Diabetes Mellitus, Type 1"[Mesh]	anti ro antibodies	(("Diabetes Mellitus, Type 1"[Mesh]) AND anti ro antibodies)
75	"Diabetes Mellitus, Type 1"[Mesh]	anti ro ssa	(("Diabetes Mellitus, Type 1"[Mesh]) AND anti ro ssa)
76	"Diabetes Mellitus, Type 1"[Mesh]	anti ro antibody	(("Diabetes Mellitus, Type 1"[Mesh]) AND anti ro antibody)
77	"Diabetes Mellitus, Type 1"[Mesh]	anti ss-a	(("Diabetes Mellitus, Type 1"[Mesh]) AND anti ss-a)
78	"Diabetes Mellitus, Type 1"[Mesh]	anti ss-a antibody	(("Diabetes Mellitus, Type 1"[Mesh]) AND anti ss-a antibody)
79	"Diabetes Mellitus, Type 1"[Mesh]	anti ro	(("Diabetes Mellitus, Type 1"[Mesh]) AND anti ro)
80	"Diabetes Mellitus, Type 1"[Mesh]	anti ro la	(("Diabetes Mellitus, Type 1"[Mesh]) AND anti ro la)
81	"Diabetes Mellitus, Type 1"[Mesh]	Anti-La	(("Diabetes Mellitus, Type 1"[Mesh]) AND Anti-La)
82	"Diabetes Mellitus, Type 1"[Mesh]	ssb antibody	(("Diabetes Mellitus, Type 1"[Mesh]) AND ssb antibody)
83	"Diabetes Mellitus, Type 1"[Mesh]	lupus anticoagulant	(("Diabetes Mellitus, Type 1"[Mesh]) AND lupus anticoagulant)
84	"Diabetes Mellitus, Type 1"[Mesh]	Antibodies, Anticardiolipin IgG	(("Diabetes Mellitus, Type 1"[Mesh]) AND Antibodies, Anticardiolipin IgG)
85	"Diabetes Mellitus, Type 1"[Mesh]	IgG aCL	(("Diabetes Mellitus, Type 1"[Mesh]) AND IgG aCL)
86	"Diabetes Mellitus, Type 1"[Mesh]	Antibodies, Anticardiolipin IgM	(("Diabetes Mellitus, Type 1"[Mesh]) AND Antibodies, Anticardiolipin IgM)
87	"Diabetes Mellitus, Type 1"[Mesh]	IgM aCL	(("Diabetes Mellitus, Type 1"[Mesh]) AND IgM aCL)
88	"Diabetes Mellitus, Type 1"[Mesh]	anti-beta2 glycoprotein	(("Diabetes Mellitus, Type 1"[Mesh]) AND anti-beta2 glycoprotein)
89	"Diabetes Mellitus, Type 1"[Mesh]	Anti-β2GP1	(("Diabetes Mellitus, Type 1"[Mesh]) AND Anti-β2GP1)
90	"Diabetes Mellitus, Type 1"[Mesh]	rheumatoid factor	(("Diabetes Mellitus, Type 1"[Mesh]) AND rheumatoid factor)
91	"Diabetes Mellitus, Type 1"[Mesh]	anti ccp antibodies	(("Diabetes Mellitus, Type 1"[Mesh]) AND anti ccp antibodies)
92	"Diabetes Mellitus, Type 1"[Mesh]	Anti CCP	(("Diabetes Mellitus, Type 1"[Mesh]) AND Anti CCP)
93	"Diabetes Mellitus, Type 1"[Mesh]	anti-gad	(("Diabetes Mellitus, Type 1"[Mesh]) AND anti-gad)
94	"Diabetes Mellitus, Type 1"[Mesh]	anti-gad antibody	(("Diabetes Mellitus, Type 1"[Mesh]) AND anti-gad antibody)
95	"Diabetes Mellitus, Type 1"[Mesh]	anti gad antibodies	(("Diabetes Mellitus, Type 1"[Mesh]) AND anti gad antibodies)
96	"Diabetes Mellitus, Type 1"[Mesh]	anti gad	(("Diabetes Mellitus, Type 1"[Mesh]) AND anti gad)
97	"Diabetes Mellitus, Type 1"[Mesh]	ICA	(("Diabetes Mellitus, Type 1"[Mesh]) AND ICA)
98	"Diabetes Mellitus, Type 1"[Mesh]	Insulin Antibodies	(("Diabetes Mellitus, Type 1"[Mesh]) AND Insulin Antibodies)
99	"Diabetes Mellitus, Type 1"[Mesh]	Anti-insulin	(("Diabetes Mellitus, Type 1"[Mesh]) AND Anti-insulin)
100	"Diabetes Mellitus, Type 1"[Mesh]	Anti-insulin antibody	(("Diabetes Mellitus, Type 1"[Mesh]) AND Anti-insulin antibody)
101	"Diabetes Mellitus, Type 1"[Mesh]	ia 2 antibody	(("Diabetes Mellitus, Type 1"[Mesh]) AND ia 2 antibody)
102	"Diabetes Mellitus, Type 1"[Mesh]	antimitochondrial antibodies	(("Diabetes Mellitus, Type 1"[Mesh]) AND antimitochondrial antibodies)
103	"Diabetes Mellitus, Type 1"[Mesh]	antimitochondrial antibody	(("Diabetes Mellitus, Type 1"[Mesh]) AND antimitochondrial antibody)
104	"Diabetes Mellitus, Type 1"[Mesh]	AMA	(("Diabetes Mellitus, Type 1"[Mesh]) AND AMA)
105	"Diabetes Mellitus, Type 1"[Mesh]	ASMA	(("Diabetes Mellitus, Type 1"[Mesh]) AND ASMA )
106	"Diabetes Mellitus, Type 1"[Mesh]	smooth muscle antibodies	(("Diabetes Mellitus, Type 1"[Mesh]) AND smooth muscle antibodies)
107	"Diabetes Mellitus, Type 1"[Mesh]	anti smooth muscle antibodies	(("Diabetes Mellitus, Type 1"[Mesh]) AND anti smooth muscle antibodies)
108	"Diabetes Mellitus, Type 1"[Mesh]	anti-smooth muscle antibodies	(("Diabetes Mellitus, Type 1"[Mesh]) AND anti-smooth muscle antibodies)
109	"Diabetes Mellitus, Type 1"[Mesh]	anti smooth muscle antibody	(("Diabetes Mellitus, Type 1"[Mesh]) AND anti smooth muscle antibody)
110	"Diabetes Mellitus, Type 1"[Mesh]	anti thyroglobulin	(("Diabetes Mellitus, Type 1"[Mesh]) AND anti thyroglobulin)
111	"Diabetes Mellitus, Type 1"[Mesh]	Anti thyroid	(("Diabetes Mellitus, Type 1"[Mesh]) AND Anti thyroid )
112	"Diabetes Mellitus, Type 1"[Mesh]	Anti thyroid antibodies	(("Diabetes Mellitus, Type 1"[Mesh]) AND Anti thyroid antibodies)
113	"Diabetes Mellitus, Type 1"[Mesh]	Anti thyroid peroxidase	(("Diabetes Mellitus, Type 1"[Mesh]) AND Anti thyroid peroxidase)
114	"Diabetes Mellitus, Type 1"[Mesh]	Anti-Tg	(("Diabetes Mellitus, Type 1"[Mesh]) AND Anti-Tg)
115	"Diabetes Mellitus, Type 1"[Mesh]	thyroperoxidase antibody	(("Diabetes Mellitus, Type 1"[Mesh]) AND thyroperoxidase antibody)
116	"Diabetes Mellitus, Type 1"[Mesh]	tpo antibodies	(("Diabetes Mellitus, Type 1"[Mesh]) AND tpo antibodies)
117	"Diabetes Mellitus, Type 1"[Mesh]	anti tpo	(("Diabetes Mellitus, Type 1"[Mesh]) AND anti tpo)
118	"Diabetes Mellitus, Type 1"[Mesh]	Anti-TPO	(("Diabetes Mellitus, Type 1"[Mesh]) AND Anti-TPO)
119	"Lupus Erythematosus, Systemic"[Mesh]	antinuclear antibodies	(("Lupus Erythematosus, Systemic"[Mesh]) AND antinuclear antibodies)
120	"Lupus Erythematosus, Systemic"[Mesh]	antinuclear antibody	(("Lupus Erythematosus, Systemic"[Mesh]) AND antinuclear antibody)
121	"Lupus Erythematosus, Systemic"[Mesh]	ANA	(("Lupus Erythematosus, Systemic"[Mesh]) AND ANA)
122	"Lupus Erythematosus, Systemic"[Mesh]	anti-dna	(("Lupus Erythematosus, Systemic"[Mesh]) AND anti-dna)
123	"Lupus Erythematosus, Systemic"[Mesh]	anti-dna antibodies	(("Lupus Erythematosus, Systemic"[Mesh]) AND anti-dna antibodies)
124	"Lupus Erythematosus, Systemic"[Mesh]	anti dsdna	(("Lupus Erythematosus, Systemic"[Mesh]) AND anti dsdna)
125	"Lupus Erythematosus, Systemic"[Mesh]	Anti-ds DNA	(("Lupus Erythematosus, Systemic"[Mesh]) AND Anti-ds DNA )
126	"Lupus Erythematosus, Systemic"[Mesh]	anti double stranded DNA	(("Lupus Erythematosus, Systemic"[Mesh]) AND anti double stranded DNA)
127	"Lupus Erythematosus, Systemic"[Mesh]	Anti RNP	(("Lupus Erythematosus, Systemic"[Mesh]) AND Anti RNP)
128	"Lupus Erythematosus, Systemic"[Mesh]	anti-rnp	(("Lupus Erythematosus, Systemic"[Mesh]) AND anti-rnp)
129	"Lupus Erythematosus, Systemic"[Mesh]	anti-rnp antibodies	(("Lupus Erythematosus, Systemic"[Mesh]) AND anti-rnp antibodies)
130	"Lupus Erythematosus, Systemic"[Mesh]	anti-sm	(("Lupus Erythematosus, Systemic"[Mesh]) AND anti-sm)
131	"Lupus Erythematosus, Systemic"[Mesh]	anti-sm antibodies	(("Lupus Erythematosus, Systemic"[Mesh]) AND anti-sm antibodies)
132	"Lupus Erythematosus, Systemic"[Mesh]	Anti-Ro	(("Lupus Erythematosus, Systemic"[Mesh]) AND Anti-Ro)
133	"Lupus Erythematosus, Systemic"[Mesh]	anti ro antibodies	(("Lupus Erythematosus, Systemic"[Mesh]) AND anti ro antibodies)
134	"Lupus Erythematosus, Systemic"[Mesh]	anti ro ssa	(("Lupus Erythematosus, Systemic"[Mesh]) AND anti ro ssa)
135	"Lupus Erythematosus, Systemic"[Mesh]	anti ro antibody	(("Lupus Erythematosus, Systemic"[Mesh]) AND anti ro antibody)
136	"Lupus Erythematosus, Systemic"[Mesh]	anti ss-a	(("Lupus Erythematosus, Systemic"[Mesh]) AND anti ss-a)
137	"Lupus Erythematosus, Systemic"[Mesh]	anti ss-a antibody	(("Lupus Erythematosus, Systemic"[Mesh]) AND anti ss-a antibody)
138	"Lupus Erythematosus, Systemic"[Mesh]	anti ro	(("Lupus Erythematosus, Systemic"[Mesh]) AND anti ro)
139	"Lupus Erythematosus, Systemic"[Mesh]	anti ro la	(("Lupus Erythematosus, Systemic"[Mesh]) AND anti ro la)
140	"Lupus Erythematosus, Systemic"[Mesh]	Anti-La	(("Lupus Erythematosus, Systemic"[Mesh]) AND Anti-La)
141	"Lupus Erythematosus, Systemic"[Mesh]	ssb antibody	(("Lupus Erythematosus, Systemic"[Mesh]) AND ssb antibody)
142	"Lupus Erythematosus, Systemic"[Mesh]	lupus anticoagulant	(("Lupus Erythematosus, Systemic"[Mesh]) AND lupus anticoagulant)
143	"Lupus Erythematosus, Systemic"[Mesh]	Antibodies, Anticardiolipin IgG	(("Lupus Erythematosus, Systemic"[Mesh]) AND Antibodies, Anticardiolipin IgG)
144	"Lupus Erythematosus, Systemic"[Mesh]	IgG aCL	(("Lupus Erythematosus, Systemic"[Mesh]) AND IgG aCL)
145	"Lupus Erythematosus, Systemic"[Mesh]	Antibodies, Anticardiolipin IgM	(("Lupus Erythematosus, Systemic"[Mesh]) AND Antibodies, Anticardiolipin IgM)
146	"Lupus Erythematosus, Systemic"[Mesh]	IgM aCL	(("Lupus Erythematosus, Systemic"[Mesh]) AND IgM aCL)
147	"Lupus Erythematosus, Systemic"[Mesh]	anti-beta2 glycoprotein	(("Lupus Erythematosus, Systemic"[Mesh]) AND anti-beta2 glycoprotein)
148	"Lupus Erythematosus, Systemic"[Mesh]	Anti-β2GP1	(("Lupus Erythematosus, Systemic"[Mesh]) AND Anti-β2GP1)
149	"Lupus Erythematosus, Systemic"[Mesh]	rheumatoid factor	(("Lupus Erythematosus, Systemic"[Mesh]) AND rheumatoid factor)
150	"Lupus Erythematosus, Systemic"[Mesh]	anti ccp antibodies	(("Lupus Erythematosus, Systemic"[Mesh]) AND anti ccp antibodies)
151	"Lupus Erythematosus, Systemic"[Mesh]	Anti CCP	(("Lupus Erythematosus, Systemic"[Mesh]) AND Anti CCP)
152	"Lupus Erythematosus, Systemic"[Mesh]	anti-gad	(("Lupus Erythematosus, Systemic"[Mesh]) AND anti-gad)
153	"Lupus Erythematosus, Systemic"[Mesh]	anti-gad antibody	(("Lupus Erythematosus, Systemic"[Mesh]) AND anti-gad antibody)
154	"Lupus Erythematosus, Systemic"[Mesh]	anti gad antibodies	(("Lupus Erythematosus, Systemic"[Mesh]) AND anti gad antibodies)
155	"Lupus Erythematosus, Systemic"[Mesh]	anti gad	(("Lupus Erythematosus, Systemic"[Mesh]) AND anti gad)
156	"Lupus Erythematosus, Systemic"[Mesh]	ICA	(("Lupus Erythematosus, Systemic"[Mesh]) AND ICA)
157	"Lupus Erythematosus, Systemic"[Mesh]	Insulin Antibodies	(("Lupus Erythematosus, Systemic"[Mesh]) AND Insulin Antibodies)
158	"Lupus Erythematosus, Systemic"[Mesh]	Anti-insulin	(("Lupus Erythematosus, Systemic"[Mesh]) AND Anti-insulin)
159	"Lupus Erythematosus, Systemic"[Mesh]	Anti-insulin antibody	(("Lupus Erythematosus, Systemic"[Mesh]) AND Anti-insulin antibody)
160	"Lupus Erythematosus, Systemic"[Mesh]	ia 2 antibody	(("Lupus Erythematosus, Systemic"[Mesh]) AND ia 2 antibody)
161	"Lupus Erythematosus, Systemic"[Mesh]	antimitochondrial antibodies	(("Lupus Erythematosus, Systemic"[Mesh]) AND antimitochondrial antibodies)
162	"Lupus Erythematosus, Systemic"[Mesh]	antimitochondrial antibody	(("Lupus Erythematosus, Systemic"[Mesh]) AND antimitochondrial antibody)
163	"Lupus Erythematosus, Systemic"[Mesh]	AMA	(("Lupus Erythematosus, Systemic"[Mesh]) AND AMA)
164	"Lupus Erythematosus, Systemic"[Mesh]	ASMA	(("Lupus Erythematosus, Systemic"[Mesh]) AND ASMA )
165	"Lupus Erythematosus, Systemic"[Mesh]	smooth muscle antibodies	(("Lupus Erythematosus, Systemic"[Mesh]) AND smooth muscle antibodies)
166	"Lupus Erythematosus, Systemic"[Mesh]	anti smooth muscle antibodies	(("Lupus Erythematosus, Systemic"[Mesh]) AND anti smooth muscle antibodies)
167	"Lupus Erythematosus, Systemic"[Mesh]	anti-smooth muscle antibodies	(("Lupus Erythematosus, Systemic"[Mesh]) AND anti-smooth muscle antibodies)
168	"Lupus Erythematosus, Systemic"[Mesh]	anti smooth muscle antibody	(("Lupus Erythematosus, Systemic"[Mesh]) AND anti smooth muscle antibody)
169	"Lupus Erythematosus, Systemic"[Mesh]	anti thyroglobulin	(("Lupus Erythematosus, Systemic"[Mesh]) AND anti thyroglobulin)
170	"Lupus Erythematosus, Systemic"[Mesh]	Anti thyroid	(("Lupus Erythematosus, Systemic"[Mesh]) AND Anti thyroid )
171	"Lupus Erythematosus, Systemic"[Mesh]	Anti thyroid antibodies	(("Lupus Erythematosus, Systemic"[Mesh]) AND Anti thyroid antibodies)
172	"Lupus Erythematosus, Systemic"[Mesh]	Anti thyroid peroxidase	(("Lupus Erythematosus, Systemic"[Mesh]) AND Anti thyroid peroxidase)
173	"Lupus Erythematosus, Systemic"[Mesh]	Anti-Tg	(("Lupus Erythematosus, Systemic"[Mesh]) AND Anti-Tg)
174	"Lupus Erythematosus, Systemic"[Mesh]	thyroperoxidase antibody	(("Lupus Erythematosus, Systemic"[Mesh]) AND thyroperoxidase antibody)
175	"Lupus Erythematosus, Systemic"[Mesh]	tpo antibodies	(("Lupus Erythematosus, Systemic"[Mesh]) AND tpo antibodies)
176	"Lupus Erythematosus, Systemic"[Mesh]	anti tpo	(("Lupus Erythematosus, Systemic"[Mesh]) AND anti tpo)
177	"Lupus Erythematosus, Systemic"[Mesh]	Anti-TPO	(("Lupus Erythematosus, Systemic"[Mesh]) AND Anti-TPO)
178	"Arthritis, Rheumatoid"[Mesh]	antinuclear antibodies	(("Arthritis, Rheumatoid"[Mesh]) AND antinuclear antibodies)
179	"Arthritis, Rheumatoid"[Mesh]	antinuclear antibody	(("Arthritis, Rheumatoid"[Mesh]) AND antinuclear antibody)
180	"Arthritis, Rheumatoid"[Mesh]	ANA	(("Arthritis, Rheumatoid"[Mesh]) AND ANA)
181	"Arthritis, Rheumatoid"[Mesh]	anti-dna	(("Arthritis, Rheumatoid"[Mesh]) AND anti-dna)
182	"Arthritis, Rheumatoid"[Mesh]	anti-dna antibodies	(("Arthritis, Rheumatoid"[Mesh]) AND anti-dna antibodies)
183	"Arthritis, Rheumatoid"[Mesh]	anti dsdna	(("Arthritis, Rheumatoid"[Mesh]) AND anti dsdna)
184	"Arthritis, Rheumatoid"[Mesh]	Anti-ds DNA	(("Arthritis, Rheumatoid"[Mesh]) AND Anti-ds DNA )
185	"Arthritis, Rheumatoid"[Mesh]	anti double stranded DNA	(("Arthritis, Rheumatoid"[Mesh]) AND anti double stranded DNA)
186	"Arthritis, Rheumatoid"[Mesh]	Anti RNP	(("Arthritis, Rheumatoid"[Mesh]) AND Anti RNP)
187	"Arthritis, Rheumatoid"[Mesh]	anti-rnp	(("Arthritis, Rheumatoid"[Mesh]) AND anti-rnp)
188	"Arthritis, Rheumatoid"[Mesh]	anti-rnp antibodies	(("Arthritis, Rheumatoid"[Mesh]) AND anti-rnp antibodies)
189	"Arthritis, Rheumatoid"[Mesh]	anti-sm	(("Arthritis, Rheumatoid"[Mesh]) AND anti-sm)
190	"Arthritis, Rheumatoid"[Mesh]	anti-sm antibodies	(("Arthritis, Rheumatoid"[Mesh]) AND anti-sm antibodies)
191	"Arthritis, Rheumatoid"[Mesh]	Anti-Ro	(("Arthritis, Rheumatoid"[Mesh]) AND Anti-Ro)
192	"Arthritis, Rheumatoid"[Mesh]	anti ro antibodies	(("Arthritis, Rheumatoid"[Mesh]) AND anti ro antibodies)
193	"Arthritis, Rheumatoid"[Mesh]	anti ro ssa	(("Arthritis, Rheumatoid"[Mesh]) AND anti ro ssa)
194	"Arthritis, Rheumatoid"[Mesh]	anti ro antibody	(("Arthritis, Rheumatoid"[Mesh]) AND anti ro antibody)
195	"Arthritis, Rheumatoid"[Mesh]	anti ss-a	(("Arthritis, Rheumatoid"[Mesh]) AND anti ss-a)
196	"Arthritis, Rheumatoid"[Mesh]	anti ss-a antibody	(("Arthritis, Rheumatoid"[Mesh]) AND anti ss-a antibody)
197	"Arthritis, Rheumatoid"[Mesh]	anti ro	(("Arthritis, Rheumatoid"[Mesh]) AND anti ro)
198	"Arthritis, Rheumatoid"[Mesh]	anti ro la	(("Arthritis, Rheumatoid"[Mesh]) AND anti ro la)
199	"Arthritis, Rheumatoid"[Mesh]	Anti-La	(("Arthritis, Rheumatoid"[Mesh]) AND Anti-La)
200	"Arthritis, Rheumatoid"[Mesh]	ssb antibody	(("Arthritis, Rheumatoid"[Mesh]) AND ssb antibody)
201	"Arthritis, Rheumatoid"[Mesh]	lupus anticoagulant	(("Arthritis, Rheumatoid"[Mesh]) AND lupus anticoagulant)
202	"Arthritis, Rheumatoid"[Mesh]	Antibodies, Anticardiolipin IgG	(("Arthritis, Rheumatoid"[Mesh]) AND Antibodies, Anticardiolipin IgG)
203	"Arthritis, Rheumatoid"[Mesh]	IgG aCL	(("Arthritis, Rheumatoid"[Mesh]) AND IgG aCL)
204	"Arthritis, Rheumatoid"[Mesh]	Antibodies, Anticardiolipin IgM	(("Arthritis, Rheumatoid"[Mesh]) AND Antibodies, Anticardiolipin IgM)
205	"Arthritis, Rheumatoid"[Mesh]	IgM aCL	(("Arthritis, Rheumatoid"[Mesh]) AND IgM aCL)
206	"Arthritis, Rheumatoid"[Mesh]	anti-beta2 glycoprotein	(("Arthritis, Rheumatoid"[Mesh]) AND anti-beta2 glycoprotein)
207	"Arthritis, Rheumatoid"[Mesh]	Anti-β2GP1	(("Arthritis, Rheumatoid"[Mesh]) AND Anti-β2GP1)
208	"Arthritis, Rheumatoid"[Mesh]	rheumatoid factor	(("Arthritis, Rheumatoid"[Mesh]) AND rheumatoid factor)
209	"Arthritis, Rheumatoid"[Mesh]	anti ccp antibodies	(("Arthritis, Rheumatoid"[Mesh]) AND anti ccp antibodies)
210	"Arthritis, Rheumatoid"[Mesh]	Anti CCP	(("Arthritis, Rheumatoid"[Mesh]) AND Anti CCP)
211	"Arthritis, Rheumatoid"[Mesh]	anti-gad	(("Arthritis, Rheumatoid"[Mesh]) AND anti-gad)
212	"Arthritis, Rheumatoid"[Mesh]	anti-gad antibody	(("Arthritis, Rheumatoid"[Mesh]) AND anti-gad antibody)
213	"Arthritis, Rheumatoid"[Mesh]	anti gad antibodies	(("Arthritis, Rheumatoid"[Mesh]) AND anti gad antibodies)
214	"Arthritis, Rheumatoid"[Mesh]	anti gad	(("Arthritis, Rheumatoid"[Mesh]) AND anti gad)
215	"Arthritis, Rheumatoid"[Mesh]	ICA	(("Arthritis, Rheumatoid"[Mesh]) AND ICA)
216	"Arthritis, Rheumatoid"[Mesh]	Insulin Antibodies	(("Arthritis, Rheumatoid"[Mesh]) AND Insulin Antibodies)
217	"Arthritis, Rheumatoid"[Mesh]	Anti-insulin	(("Arthritis, Rheumatoid"[Mesh]) AND Anti-insulin)
218	"Arthritis, Rheumatoid"[Mesh]	Anti-insulin antibody	(("Arthritis, Rheumatoid"[Mesh]) AND Anti-insulin antibody)
219	"Arthritis, Rheumatoid"[Mesh]	ia 2 antibody	(("Arthritis, Rheumatoid"[Mesh]) AND ia 2 antibody)
220	"Arthritis, Rheumatoid"[Mesh]	antimitochondrial antibodies	(("Arthritis, Rheumatoid"[Mesh]) AND antimitochondrial antibodies)
221	"Arthritis, Rheumatoid"[Mesh]	antimitochondrial antibody	(("Arthritis, Rheumatoid"[Mesh]) AND antimitochondrial antibody)
222	"Arthritis, Rheumatoid"[Mesh]	AMA	(("Arthritis, Rheumatoid"[Mesh]) AND AMA)
223	"Arthritis, Rheumatoid"[Mesh]	ASMA	(("Arthritis, Rheumatoid"[Mesh]) AND ASMA )
224	"Arthritis, Rheumatoid"[Mesh]	smooth muscle antibodies	(("Arthritis, Rheumatoid"[Mesh]) AND smooth muscle antibodies)
225	"Arthritis, Rheumatoid"[Mesh]	anti smooth muscle antibodies	(("Arthritis, Rheumatoid"[Mesh]) AND anti smooth muscle antibodies)
226	"Arthritis, Rheumatoid"[Mesh]	anti-smooth muscle antibodies	(("Arthritis, Rheumatoid"[Mesh]) AND anti-smooth muscle antibodies)
227	"Arthritis, Rheumatoid"[Mesh]	anti smooth muscle antibody	(("Arthritis, Rheumatoid"[Mesh]) AND anti smooth muscle antibody)
228	"Arthritis, Rheumatoid"[Mesh]	anti thyroglobulin	(("Arthritis, Rheumatoid"[Mesh]) AND anti thyroglobulin)
229	"Arthritis, Rheumatoid"[Mesh]	Anti thyroid	(("Arthritis, Rheumatoid"[Mesh]) AND Anti thyroid )
230	"Arthritis, Rheumatoid"[Mesh]	Anti thyroid antibodies	(("Arthritis, Rheumatoid"[Mesh]) AND Anti thyroid antibodies)
231	"Arthritis, Rheumatoid"[Mesh]	Anti thyroid peroxidase	(("Arthritis, Rheumatoid"[Mesh]) AND Anti thyroid peroxidase)
232	"Arthritis, Rheumatoid"[Mesh]	Anti-Tg	(("Arthritis, Rheumatoid"[Mesh]) AND Anti-Tg)
233	"Arthritis, Rheumatoid"[Mesh]	thyroperoxidase antibody	(("Arthritis, Rheumatoid"[Mesh]) AND thyroperoxidase antibody)
234	"Arthritis, Rheumatoid"[Mesh]	tpo antibodies	(("Arthritis, Rheumatoid"[Mesh]) AND tpo antibodies)
235	"Arthritis, Rheumatoid"[Mesh]	anti tpo	(("Arthritis, Rheumatoid"[Mesh]) AND anti tpo)
236	"Arthritis, Rheumatoid"[Mesh]	Anti-TPO	(("Arthritis, Rheumatoid"[Mesh]) AND Anti-TPO)
237	"Hepatitis, Autoimmune"[Mesh]	antinuclear antibodies	(("Hepatitis, Autoimmune"[Mesh]) AND antinuclear antibodies)
238	"Hepatitis, Autoimmune"[Mesh]	antinuclear antibody	(("Hepatitis, Autoimmune"[Mesh]) AND antinuclear antibody)
239	"Hepatitis, Autoimmune"[Mesh]	ANA	(("Hepatitis, Autoimmune"[Mesh]) AND ANA)
240	"Hepatitis, Autoimmune"[Mesh]	anti-dna	(("Hepatitis, Autoimmune"[Mesh]) AND anti-dna)
241	"Hepatitis, Autoimmune"[Mesh]	anti-dna antibodies	(("Hepatitis, Autoimmune"[Mesh]) AND anti-dna antibodies)
242	"Hepatitis, Autoimmune"[Mesh]	anti dsdna	(("Hepatitis, Autoimmune"[Mesh]) AND anti dsdna)
243	"Hepatitis, Autoimmune"[Mesh]	Anti-ds DNA	(("Hepatitis, Autoimmune"[Mesh]) AND Anti-ds DNA )
244	"Hepatitis, Autoimmune"[Mesh]	anti double stranded DNA	(("Hepatitis, Autoimmune"[Mesh]) AND anti double stranded DNA)
245	"Hepatitis, Autoimmune"[Mesh]	Anti RNP	(("Hepatitis, Autoimmune"[Mesh]) AND Anti RNP)
246	"Hepatitis, Autoimmune"[Mesh]	anti-rnp	(("Hepatitis, Autoimmune"[Mesh]) AND anti-rnp)
247	"Hepatitis, Autoimmune"[Mesh]	anti-rnp antibodies	(("Hepatitis, Autoimmune"[Mesh]) AND anti-rnp antibodies)
248	"Hepatitis, Autoimmune"[Mesh]	anti-sm	(("Hepatitis, Autoimmune"[Mesh]) AND anti-sm)
249	"Hepatitis, Autoimmune"[Mesh]	anti-sm antibodies	(("Hepatitis, Autoimmune"[Mesh]) AND anti-sm antibodies)
250	"Hepatitis, Autoimmune"[Mesh]	Anti-Ro	(("Hepatitis, Autoimmune"[Mesh]) AND Anti-Ro)
251	"Hepatitis, Autoimmune"[Mesh]	anti ro antibodies	(("Hepatitis, Autoimmune"[Mesh]) AND anti ro antibodies)
252	"Hepatitis, Autoimmune"[Mesh]	anti ro ssa	(("Hepatitis, Autoimmune"[Mesh]) AND anti ro ssa)
253	"Hepatitis, Autoimmune"[Mesh]	anti ro antibody	(("Hepatitis, Autoimmune"[Mesh]) AND anti ro antibody)
254	"Hepatitis, Autoimmune"[Mesh]	anti ss-a	(("Hepatitis, Autoimmune"[Mesh]) AND anti ss-a)
255	"Hepatitis, Autoimmune"[Mesh]	anti ss-a antibody	(("Hepatitis, Autoimmune"[Mesh]) AND anti ss-a antibody)
256	"Hepatitis, Autoimmune"[Mesh]	anti ro	(("Hepatitis, Autoimmune"[Mesh]) AND anti ro)
257	"Hepatitis, Autoimmune"[Mesh]	anti ro la	(("Hepatitis, Autoimmune"[Mesh]) AND anti ro la)
258	"Hepatitis, Autoimmune"[Mesh]	Anti-La	(("Hepatitis, Autoimmune"[Mesh]) AND Anti-La)
259	"Hepatitis, Autoimmune"[Mesh]	ssb antibody	(("Hepatitis, Autoimmune"[Mesh]) AND ssb antibody)
260	"Hepatitis, Autoimmune"[Mesh]	lupus anticoagulant	(("Hepatitis, Autoimmune"[Mesh]) AND lupus anticoagulant)
261	"Hepatitis, Autoimmune"[Mesh]	Antibodies, Anticardiolipin IgG	(("Hepatitis, Autoimmune"[Mesh]) AND Antibodies, Anticardiolipin IgG)
262	"Hepatitis, Autoimmune"[Mesh]	IgG aCL	(("Hepatitis, Autoimmune"[Mesh]) AND IgG aCL)
263	"Hepatitis, Autoimmune"[Mesh]	Antibodies, Anticardiolipin IgM	(("Hepatitis, Autoimmune"[Mesh]) AND Antibodies, Anticardiolipin IgM)
264	"Hepatitis, Autoimmune"[Mesh]	IgM aCL	(("Hepatitis, Autoimmune"[Mesh]) AND IgM aCL)
265	"Hepatitis, Autoimmune"[Mesh]	anti-beta2 glycoprotein	(("Hepatitis, Autoimmune"[Mesh]) AND anti-beta2 glycoprotein)
266	"Hepatitis, Autoimmune"[Mesh]	Anti-β2GP1	(("Hepatitis, Autoimmune"[Mesh]) AND Anti-β2GP1)
267	"Hepatitis, Autoimmune"[Mesh]	rheumatoid factor	(("Hepatitis, Autoimmune"[Mesh]) AND rheumatoid factor)
268	"Hepatitis, Autoimmune"[Mesh]	anti ccp antibodies	(("Hepatitis, Autoimmune"[Mesh]) AND anti ccp antibodies)
269	"Hepatitis, Autoimmune"[Mesh]	Anti CCP	(("Hepatitis, Autoimmune"[Mesh]) AND Anti CCP)
270	"Hepatitis, Autoimmune"[Mesh]	anti-gad	(("Hepatitis, Autoimmune"[Mesh]) AND anti-gad)
271	"Hepatitis, Autoimmune"[Mesh]	anti-gad antibody	(("Hepatitis, Autoimmune"[Mesh]) AND anti-gad antibody)
272	"Hepatitis, Autoimmune"[Mesh]	anti gad antibodies	(("Hepatitis, Autoimmune"[Mesh]) AND anti gad antibodies)
273	"Hepatitis, Autoimmune"[Mesh]	anti gad	(("Hepatitis, Autoimmune"[Mesh]) AND anti gad)
274	"Hepatitis, Autoimmune"[Mesh]	ICA	(("Hepatitis, Autoimmune"[Mesh]) AND ICA)
275	"Hepatitis, Autoimmune"[Mesh]	Insulin Antibodies	(("Hepatitis, Autoimmune"[Mesh]) AND Insulin Antibodies)
276	"Hepatitis, Autoimmune"[Mesh]	Anti-insulin	(("Hepatitis, Autoimmune"[Mesh]) AND Anti-insulin)
277	"Hepatitis, Autoimmune"[Mesh]	Anti-insulin antibody	(("Hepatitis, Autoimmune"[Mesh]) AND Anti-insulin antibody)
278	"Hepatitis, Autoimmune"[Mesh]	ia 2 antibody	(("Hepatitis, Autoimmune"[Mesh]) AND ia 2 antibody)
279	"Hepatitis, Autoimmune"[Mesh]	antimitochondrial antibodies	(("Hepatitis, Autoimmune"[Mesh]) AND antimitochondrial antibodies)
280	"Hepatitis, Autoimmune"[Mesh]	antimitochondrial antibody	(("Hepatitis, Autoimmune"[Mesh]) AND antimitochondrial antibody)
281	"Hepatitis, Autoimmune"[Mesh]	AMA	(("Hepatitis, Autoimmune"[Mesh]) AND AMA)
282	"Hepatitis, Autoimmune"[Mesh]	ASMA	(("Hepatitis, Autoimmune"[Mesh]) AND ASMA )
283	"Hepatitis, Autoimmune"[Mesh]	smooth muscle antibodies	(("Hepatitis, Autoimmune"[Mesh]) AND smooth muscle antibodies)
284	"Hepatitis, Autoimmune"[Mesh]	anti smooth muscle antibodies	(("Hepatitis, Autoimmune"[Mesh]) AND anti smooth muscle antibodies)
285	"Hepatitis, Autoimmune"[Mesh]	anti-smooth muscle antibodies	(("Hepatitis, Autoimmune"[Mesh]) AND anti-smooth muscle antibodies)
286	"Hepatitis, Autoimmune"[Mesh]	anti smooth muscle antibody	(("Hepatitis, Autoimmune"[Mesh]) AND anti smooth muscle antibody)
287	"Hepatitis, Autoimmune"[Mesh]	anti thyroglobulin	(("Hepatitis, Autoimmune"[Mesh]) AND anti thyroglobulin)
288	"Hepatitis, Autoimmune"[Mesh]	Anti thyroid	(("Hepatitis, Autoimmune"[Mesh]) AND Anti thyroid )
289	"Hepatitis, Autoimmune"[Mesh]	Anti thyroid antibodies	(("Hepatitis, Autoimmune"[Mesh]) AND Anti thyroid antibodies)
290	"Hepatitis, Autoimmune"[Mesh]	Anti thyroid peroxidase	(("Hepatitis, Autoimmune"[Mesh]) AND Anti thyroid peroxidase)
291	"Hepatitis, Autoimmune"[Mesh]	Anti-Tg	(("Hepatitis, Autoimmune"[Mesh]) AND Anti-Tg)
292	"Hepatitis, Autoimmune"[Mesh]	thyroperoxidase antibody	(("Hepatitis, Autoimmune"[Mesh]) AND thyroperoxidase antibody)
293	"Hepatitis, Autoimmune"[Mesh]	tpo antibodies	(("Hepatitis, Autoimmune"[Mesh]) AND tpo antibodies)
294	"Hepatitis, Autoimmune"[Mesh]	anti tpo	(("Hepatitis, Autoimmune"[Mesh]) AND anti tpo)
295	"Hepatitis, Autoimmune"[Mesh]	Anti-TPO	(("Hepatitis, Autoimmune"[Mesh]) AND Anti-TPO)
296	"Multiple Sclerosis"[Mesh]	antinuclear antibodies	(("Multiple Sclerosis"[Mesh]) AND antinuclear antibodies)
297	"Multiple Sclerosis"[Mesh]	antinuclear antibody	(("Multiple Sclerosis"[Mesh]) AND antinuclear antibody)
298	"Multiple Sclerosis"[Mesh]	ANA	(("Multiple Sclerosis"[Mesh]) AND ANA)
299	"Multiple Sclerosis"[Mesh]	anti-dna	(("Multiple Sclerosis"[Mesh]) AND anti-dna)
300	"Multiple Sclerosis"[Mesh]	anti-dna antibodies	(("Multiple Sclerosis"[Mesh]) AND anti-dna antibodies)
301	"Multiple Sclerosis"[Mesh]	anti dsdna	(("Multiple Sclerosis"[Mesh]) AND anti dsdna)
302	"Multiple Sclerosis"[Mesh]	Anti-ds DNA	(("Multiple Sclerosis"[Mesh]) AND Anti-ds DNA )
303	"Multiple Sclerosis"[Mesh]	anti double stranded DNA	(("Multiple Sclerosis"[Mesh]) AND anti double stranded DNA)
304	"Multiple Sclerosis"[Mesh]	Anti RNP	(("Multiple Sclerosis"[Mesh]) AND Anti RNP)
305	"Multiple Sclerosis"[Mesh]	anti-rnp	(("Multiple Sclerosis"[Mesh]) AND anti-rnp)
306	"Multiple Sclerosis"[Mesh]	anti-rnp antibodies	(("Multiple Sclerosis"[Mesh]) AND anti-rnp antibodies)
307	"Multiple Sclerosis"[Mesh]	anti-sm	(("Multiple Sclerosis"[Mesh]) AND anti-sm)
308	"Multiple Sclerosis"[Mesh]	anti-sm antibodies	(("Multiple Sclerosis"[Mesh]) AND anti-sm antibodies)
309	"Multiple Sclerosis"[Mesh]	Anti-Ro	(("Multiple Sclerosis"[Mesh]) AND Anti-Ro)
310	"Multiple Sclerosis"[Mesh]	anti ro antibodies	(("Multiple Sclerosis"[Mesh]) AND anti ro antibodies)
311	"Multiple Sclerosis"[Mesh]	anti ro ssa	(("Multiple Sclerosis"[Mesh]) AND anti ro ssa)
312	"Multiple Sclerosis"[Mesh]	anti ro antibody	(("Multiple Sclerosis"[Mesh]) AND anti ro antibody)
313	"Multiple Sclerosis"[Mesh]	anti ss-a	(("Multiple Sclerosis"[Mesh]) AND anti ss-a)
314	"Multiple Sclerosis"[Mesh]	anti ss-a antibody	(("Multiple Sclerosis"[Mesh]) AND anti ss-a antibody)
315	"Multiple Sclerosis"[Mesh]	anti ro	(("Multiple Sclerosis"[Mesh]) AND anti ro)
316	"Multiple Sclerosis"[Mesh]	anti ro la	(("Multiple Sclerosis"[Mesh]) AND anti ro la)
317	"Multiple Sclerosis"[Mesh]	Anti-La	(("Multiple Sclerosis"[Mesh]) AND Anti-La)
318	"Multiple Sclerosis"[Mesh]	ssb antibody	(("Multiple Sclerosis"[Mesh]) AND ssb antibody)
319	"Multiple Sclerosis"[Mesh]	lupus anticoagulant	(("Multiple Sclerosis"[Mesh]) AND lupus anticoagulant)
320	"Multiple Sclerosis"[Mesh]	Antibodies, Anticardiolipin IgG	(("Multiple Sclerosis"[Mesh]) AND Antibodies, Anticardiolipin IgG)
321	"Multiple Sclerosis"[Mesh]	IgG aCL	(("Multiple Sclerosis"[Mesh]) AND IgG aCL)
322	"Multiple Sclerosis"[Mesh]	Antibodies, Anticardiolipin IgM	(("Multiple Sclerosis"[Mesh]) AND Antibodies, Anticardiolipin IgM)
323	"Multiple Sclerosis"[Mesh]	IgM aCL	(("Multiple Sclerosis"[Mesh]) AND IgM aCL)
324	"Multiple Sclerosis"[Mesh]	anti-beta2 glycoprotein	(("Multiple Sclerosis"[Mesh]) AND anti-beta2 glycoprotein)
325	"Multiple Sclerosis"[Mesh]	Anti-β2GP1	(("Multiple Sclerosis"[Mesh]) AND Anti-β2GP1)
326	"Multiple Sclerosis"[Mesh]	rheumatoid factor	(("Multiple Sclerosis"[Mesh]) AND rheumatoid factor)
327	"Multiple Sclerosis"[Mesh]	anti ccp antibodies	(("Multiple Sclerosis"[Mesh]) AND anti ccp antibodies)
328	"Multiple Sclerosis"[Mesh]	Anti CCP	(("Multiple Sclerosis"[Mesh]) AND Anti CCP)
329	"Multiple Sclerosis"[Mesh]	anti-gad	(("Multiple Sclerosis"[Mesh]) AND anti-gad)
330	"Multiple Sclerosis"[Mesh]	anti-gad antibody	(("Multiple Sclerosis"[Mesh]) AND anti-gad antibody)
331	"Multiple Sclerosis"[Mesh]	anti gad antibodies	(("Multiple Sclerosis"[Mesh]) AND anti gad antibodies)
332	"Multiple Sclerosis"[Mesh]	anti gad	(("Multiple Sclerosis"[Mesh]) AND anti gad)
333	"Multiple Sclerosis"[Mesh]	ICA	(("Multiple Sclerosis"[Mesh]) AND ICA)
334	"Multiple Sclerosis"[Mesh]	Insulin Antibodies	(("Multiple Sclerosis"[Mesh]) AND Insulin Antibodies)
335	"Multiple Sclerosis"[Mesh]	Anti-insulin	(("Multiple Sclerosis"[Mesh]) AND Anti-insulin)
336	"Multiple Sclerosis"[Mesh]	Anti-insulin antibody	(("Multiple Sclerosis"[Mesh]) AND Anti-insulin antibody)
337	"Multiple Sclerosis"[Mesh]	ia 2 antibody	(("Multiple Sclerosis"[Mesh]) AND ia 2 antibody)
338	"Multiple Sclerosis"[Mesh]	antimitochondrial antibodies	(("Multiple Sclerosis"[Mesh]) AND antimitochondrial antibodies)
339	"Multiple Sclerosis"[Mesh]	antimitochondrial antibody	(("Multiple Sclerosis"[Mesh]) AND antimitochondrial antibody)
340	"Multiple Sclerosis"[Mesh]	AMA	(("Multiple Sclerosis"[Mesh]) AND AMA)
341	"Multiple Sclerosis"[Mesh]	ASMA	(("Multiple Sclerosis"[Mesh]) AND ASMA )
342	"Multiple Sclerosis"[Mesh]	smooth muscle antibodies	(("Multiple Sclerosis"[Mesh]) AND smooth muscle antibodies)
343	"Multiple Sclerosis"[Mesh]	anti smooth muscle antibodies	(("Multiple Sclerosis"[Mesh]) AND anti smooth muscle antibodies)
344	"Multiple Sclerosis"[Mesh]	anti-smooth muscle antibodies	(("Multiple Sclerosis"[Mesh]) AND anti-smooth muscle antibodies)
345	"Multiple Sclerosis"[Mesh]	anti smooth muscle antibody	(("Multiple Sclerosis"[Mesh]) AND anti smooth muscle antibody)
346	"Multiple Sclerosis"[Mesh]	anti thyroglobulin	(("Multiple Sclerosis"[Mesh]) AND anti thyroglobulin)
347	"Multiple Sclerosis"[Mesh]	Anti thyroid	(("Multiple Sclerosis"[Mesh]) AND Anti thyroid )
348	"Multiple Sclerosis"[Mesh]	Anti thyroid antibodies	(("Multiple Sclerosis"[Mesh]) AND Anti thyroid antibodies)
349	"Multiple Sclerosis"[Mesh]	Anti thyroid peroxidase	(("Multiple Sclerosis"[Mesh]) AND Anti thyroid peroxidase)
350	"Multiple Sclerosis"[Mesh]	Anti-Tg	(("Multiple Sclerosis"[Mesh]) AND Anti-Tg)
351	"Multiple Sclerosis"[Mesh]	thyroperoxidase antibody	(("Multiple Sclerosis"[Mesh]) AND thyroperoxidase antibody)
352	"Multiple Sclerosis"[Mesh]	tpo antibodies	(("Multiple Sclerosis"[Mesh]) AND tpo antibodies)
353	"Multiple Sclerosis"[Mesh]	anti tpo	(("Multiple Sclerosis"[Mesh]) AND anti tpo)
354	"Multiple Sclerosis"[Mesh]	Anti-TPO	(("Multiple Sclerosis"[Mesh]) AND Anti-TPO)

## Sheet: Supplementary Table 2
Supplementary Table 2. Prevalence of the the sharing of autoantibodies in RA. SLE. AIH. T1D and SS
	RA	SLE	SS	MS	AIH	T1D
Autoantibodies, prevalence % [ref]
ANAs	18 [1]	87.6 [2]	77.7 [2]	22.5 [3]	70.7 [4]	20 [5]
	64 [6]	98.6 [7]	79 [8]	27.2 [9]	78.9 [10]	1 [11]
	82.3 [12]	98.8 [13]	95 [14]	17.8 [15]	66 [16]
	16.2 [17]	77.4 [18]	86 [19]	6.7 [20]	76 [21]
	42 [22]	90.6 [23]	80.6 [24]	32 [25]	50 [26]
	51 [27]	76 [28]	78.4 [29]	15 [30]
	32.1 [2]	96.2 [31]	67 [32]	35 [33]
	37.5 [34]	100 [35]	87.2 [36]	28 [37]
	47 [38]	88 [39]	83.6 [40]	52 [19]
		98 [41]	62 [42]	14.4 [43]
			86b [2]
			77.7b [2]
Anti-dsDNA	11.7 [12]	42.04 [12]	7.6 [36]	28 [19]	23 [44]	ND
	10 [27]	13.5 [7]	0 [45]	0 [43]
		57 [13]	5.2 [36]
		47.2 [18]
		68 [46]
		62 [47]
		56a [48]
		69b [28]
		29.1 [31]
		63b [49]
		69.3 [50]
		62 [35]
		67 [39]
		54 [41]
Anti-RNP	16 [51]	25.7 [13]	1.3 [36]	ND	46 [16]	ND
		68.8 [52]	2.48 [53]
		39 [54]	2 [55]
		13.6 [18]
		28 [56]
		24.3 [31]
		62.5 [57]
		20 [58]
Anti-Sm	2h [59]	26.52 [60]	1.49 [53]	ND	ND	ND
	0h [61]	13.5 [7]	1 [55]
		15.1 [13]
		41.4 [52]
		34 [54]
		11.1 [18]
		15 [56]
		42 [48]
		28.1 [31]
		33 [41]
		38.3 [57]
Anti-La	11.3 [6]	6.87 [60]	32.7 [8]	0 [33]	3.1 [62]	ND
		13.6 [13]	46b [63]
		18.8 [52]	72b [63]
		35 [54]	39.1 [14]
		12.4 [18]	57 [64]
		14 [56]	37.3 [65]
		14.5 [31]	57 [19]
		3 [41]	32 [66]
			44.5 [67]
			40 [32]
			53.2 [36]
			25 [68]
			13.6 [40]
			38 [42]
			35 [69]
Anti-Ro	13.2 [6]	40.86 [60]	13.6 [8]	0 [33]	13.6 [62]	ND
	5.2 [12]	19.4 [7]	72b [63]		6 [70]
	4 [27]	37.1 [13]	61b [63]
	3.6 [71]	60.15 [52]	81.6 [14]
		61 [54]	71 [64]
		27 [18]	58.9e [65]
		53 [65]	63 [19]
		31.5 [31]	42 [66]
		37 [41]	82.2 [67]
			49 [32]
			79.9 [36]
			65 [68]
			46.7 [40]
			46 [42]
			53 [69]
LAC	0 [72]	6.68 [60]	ND	ND	ND	ND
		9 [73]
		29.9 [13]
		11.2 [74]
		28.9 [75]
		27.4 [76]
		25.5 [77]
		29 [78]
		43.3 [79]
		19 [56]
		21 [39]
IgG Anticardiolipin	3 [80]	27.9 [81]	4 [82]	0.8 [83]	39 [84]	2.7 [85]
	8.3 [72]	26.32d [60]		0.9b [86]
	21 [87]	36.1 [7]		0.3b [86]
		27 [13]		4.8 [25]
		29.5 [74]		18.2 [19]
		23.5 [88]		4.8 [43]
		18 [89]
		36.7d [75]
		35.4d [77]
		26 [78]
		28.4 [79]
		21 [56]
		22 [39]
		34 [41]
IgM Anticardiolipin	16 [80]	27.6 [81]	11 [82]	1.6 [83]	23.7 [84]	5.4 [85]
	2.4 [72]	11.4 [13]		1.8b [86]
	1 [87]	7 [89]		1.5b [86]
		27 [78]		6.5 [25]
		11.7 [79]		4.8d [19]
		7 [56]
IgM Anti-B2GP1	4.8 [72]	15.8 [90]	ND	0.8 [83]	ND	ND
		13.7 [74]
		9 [89]
IgG Anti-B2GP1	7.2 [72]	23.6 [7]	ND	0.4 [83]	3.4 [84]
	4 [87]	5.4 [90]		17.1d [19]
		38.1 [74]		4.8d [43]
		18.6d [88]
		7 [89]
		15d [91]
		17 [92]
RF	79 [93]	12.9 [94]	48.1 [8]	1.6 [43]	30 [95]	ND
	60c [96]	45.3 [97]	66.7 [14]
	46c [96]		52 [64]
	40.4c [96]		70 [19]
	80 [98]		59.7 [65]
	75.6 [99]		19 [32]
	71 [1]		60.6 [36]
	67.4 [100]		58.7 [40]
	72 [6]		69.9 [69]
	64 [101]
	94 [12]
	76 [102]
	51.4 [103]
	62 [104]
	63 [105]
	65 [106]
	69.7 [107]
	87 [17]
	61 [108]
	64 [109]
	64 [22]
	70.8 [110]
	78 [27]
	75 [111]
	81.7 [112]
	57 [38]
Anti-CCP	66 [93]	5.5 [94]	9.9 [14]	ND	21 [95]	1.8 [113]
	75 [113]	8 [114]	9 [114]		9 [115]
	85 [116]	27.3 [97]	3 [64]
	81.6 [99]	17 [117]	7.5 [65]
	76.2 [118]	13.8 [119]	4.8 [24]
	70 [120]
	78.9 [100]
	62 [101]
	72 [102]
	57 [104]
	81 [105]
	68 [121]
	54 [106]
	74 [107]
	55 [108]
	64 [109]
	66 [110]
	82.5 [112]
	53 [38]
Anti-GAD	ND	ND	ND	ND	3.57 [122]	58.6f [123]
						40.5 [113]
						71.5 [124]
						59 [125]
						46 [126]
						37 [127]
						51.2 [128]
						13.9 [129]
						11.2g [130]
						80.7 [131]
						81 [132]
						46.1 [133]
						52 [5]
						21 [134]
						59.5 [135]
						39.6 [136]
						74 [137]
						73.2 [138]
						67.6 [139]
						55.2 [140]
						70.3 [141]
						69.6 [142]
						82 [143]
						74f [144]
						71f [145]
ICA	ND	ND	ND	ND	60.7 [122]	21.4 [128]
						70.3 [129]
						12.5g [130]
						70.8 [131]
						23 [134]
						74.07 [135]
						36.4 [146]
						65.5 [140]
						83.8 [141]
						46.8 [142]
						73.1f [147]
						64 [144]
						77 [11]
IAA	ND	ND	ND	ND	18.5 [122]	72 [148]
						56 [127]
						50.4 [135]
						54 [149]
						27 [150]
						55.9 [141]
						82 [143]
AMA	ND	1 [39]	ND	2.7 [20]	18 [4]	ND
		2.04 [151]			0 [10]
ASMA	ND	2.04 [151]	ND	6.7 [20]	77 [4]	1 [11]
					68.4 [10]
					80 [152]
					42 [153]
					44 [26]
					33 [21]
					88 [16]
Anti-TG	23 [154]	15.4 [155]	9 [19]	8.5 [156]	ND	30 [157]
	12 [158]	21 [159]	9 [160]			30 [126]
		17 [161]				7 [162]
						20.3 [85]
Anti-TPO	37 [154]	27.6 [155]	11 [63]	21.7 [156]	ND	39.6 [157]
	15 [158]	15 [159]	9 [19]	6.5 [163]		30 [126]
	13 [164]		9 [160]			17 [162]
						17 [140]
						24.3 [85]
a. Raised anti-dsDNA on two consecutive occasions. Anti-Sm present in any occasion
b. The antibody was measured by two different techniques
c. Prevalence of the same antibody in three different populations
d. Results using a screen kit (IgG and IgM)
e. Prevalence of Ro60kDa + Ro52kDa
f. Prevalence depends on the duration of the disease. In the table is reported the prevalence between 0-5 years
g. Prevalence in patients with Latent Autoimmune Diabetes in Adults (LADA)
h. Sample size less than 50 patients
Abreviations:
RA: rheumatoid arthritis, SLE: systemic lupus erythematosus, AIH: autoimmune hepatitis, T1D: type 1 diabetes,
SS: Sjögren´s syndrome, MS: multiple sclerosis, ANAs: antinuclear antibodies, Anti-ds DNA: anti-double stranded DNA antibodies
Anti-RNP: anti-ribonucleoprotein antibodies, LAC: lupic anticoagulant, β2GP1: Anti-beta-2-glicoprotein 1, RF: rheumatoid factor
Anti-CCP: anti-cyclic citrullinated peptide antibody, anti-GAD: anti-glutamic acid decarboxylase antibodies, IAA: anti-isulin antibodies
ICA: anti-islet cell antibodies, AMA: anti-mitochondrial antibodies, ASMA: anti-smooth muscle antibody
Anti-TG: anti-thyroglobulin antibodies, Anti-TPO: anti-thyroid peroxidase antibody, ND: no data,

## Sheet: References Supp Table 2
References Supplementary Table 2
[1] Bettero RG, Cebrian RF, Skare TL. [Prevalence of ocular manifestation in 198 patients with rheumatoid arthritis: a retrospective study]. Arq Bras Oftalmol. 2008;71:365-9.
[2] Bayer PM, Bauerfeind S, Bienvenu J, Fabien N, Frei PC, Gilburd B, et al. Multicenter evaluation study on a new HEp2 ANA screening enzyme immune assay. J Autoimmun. 1999;13:89-93.
[3] Collard RC, Koehler RP, Mattson DH. Frequency and significance of antinuclear antibodies in multiple sclerosis. Neurology. 1997;49:857-61.
[4] Montano-Loza AJ, Carpenter HA, Czaja AJ. Frequency, behavior, and prognostic implications of antimitochondrial antibodies in type 1 autoimmune hepatitis. J Clin Gastroenterol. 2008;42:1047-53.
[5] Hayashi H, Kusaka I, Nagasaka S, Kawakami A, Rokkaku K, Nakamura T, et al. Association of CTLA-4 polymorphism with positive anti-GAD antibody in Japanese subjects with type 1 diabetes mellitus. Clin Endocrinol (Oxf). 1999;51:793-9.
[6] Schneeberger E, Citera G, Heredia M, Maldonado Cocco J. Clinical significance of anti-Ro antibodies in rheumatoid arthritis. Clin Rheumatol. 2008;27:517-9.
[7] Santiago M, Martinelli R, Reis MG, Reis EA, Ko A, Fontes RD, et al. Diagnostic performance of anti-beta2 glycoprotein I and anticardiolipin assays for clinical manifestations of the antiphospholipid syndrome. Clin Rheumatol. 2004;23:485-9.
[8] Huo AP, Lin KC, Chou CT. Predictive and prognostic value of antinuclear antibodies and rheumatoid factor in primary Sjogren's syndrome. Int J Rheum Dis. 2010;13:39-47.
[9] Barned S, Goodman AD, Mattson DH. Frequency of anti-nuclear antibodies in multiple sclerosis. Neurology. 1995;45:384-5.
[10] Alric L, Thebault S, Selves J, Peron JM, Mejdoubi S, Fortenfant F, et al. Characterization of overlap syndrome between primary biliary cirrhosis and autoimmune hepatitis according to antimitochondrial antibodies status. Gastroenterol Clin Biol. 2007;31:11-6.
[11] Kostal M, Michalkova D, Hrabcakova D. Antireticulin antibodies in sera of children with insulin-dependent diabetes mellitus. Diabetes Res Clin Pract. 1992;17:183-90.
[12] Cavazzana I, Bobbio-Pallavicini F, Bazzani C, Bravi E, Zingarelli S, Ceribelli A, et al. [TNF-alpha inhibition in anti-Ro/SSA positive patients with rheumatoid arthritis: clinical and immunologic effects]. Reumatismo. 2006;58:275-82.
[13] Alba P, Bento L, Cuadrado MJ, Karim Y, Tungekar MF, Abbs I, et al. Anti-dsDNA, anti-Sm antibodies, and the lupus anticoagulant: significant factors associated with lupus nephritis. Ann Rheum Dis. 2003;62:556-60.
[14] Atzeni F, Sarzi-Puttini P, Lama N, Bonacci E, Bobbio-Pallavicini F, Montecucco C, et al. Anti-cyclic citrullinated peptide antibodies in primary Sjogren syndrome may be associated with non-erosive synovitis. Arthritis Research & Therapy. 2008;10:R51.
[15] Doi H, Matsushita T, Isobe N, Matsuoka T, Minohara M, Ochi H, et al. Hypercomplementemia at relapse in patients with anti-aquaporin-4 antibody. Mult Scler. 2009;15:304-10.
[16] Torres-Collado AX, Czaja AJ, Gelpi C. Anti-tRNP(ser)sec/SLA/LP autoantibodies. Comparative study using in-house ELISA with a recombinant 48.8 kDa protein, immunoblot, and analysis of immunoprecipitated RNAs. Liver Int. 2005;25:410-9.
[17] Matsos MP, Pope JE, Spencer-Green G. ANA+ (anti-nuclear antibody) is correlated with RF+ (rheumatoid factor) in rheumatoid arthritis. Inflammopharmacology. 2004;12:229-31.
[18] Chung SA, Taylor KE, Graham RR, Nititham J, Lee AT, Ortmann WA, et al. Differential genetic associations for systemic lupus erythematosus based on anti-dsDNA autoantibody production. PLoS Genet. 2011;7:e1001323.
[19] Roussel V, Yi F, Jauberteau MO, Couderq C, Lacombe C, Michelet V, et al. Prevalence and clinical significance of anti-phospholipid antibodies in multiple sclerosis: a study of 89 patients. J Autoimmun. 2000;14:259-65.
[20] Vilisaar J, Wilson M, Niepel G, Blumhardt LD, Constantinescu CS. A comparative audit of anticardiolipin antibodies in oligoclonal band negative and positive multiple sclerosis. Mult Scler. 2005;11:378-80.
[21] Bittencourt PL, Farias AQ, Porta G, Cancado EL, Miura I, Pugliese R, et al. Frequency of concurrent autoimmune disorders in patients with autoimmune hepatitis: effect of age, gender, and genetic background. J Clin Gastroenterol. 2008;42:300-5.
[22] Jacobsen S. Young age of onset is associated with increased prevalence of circulating IgM rheumatoid factor and antinuclear antibodies at presentation in women with rheumatoid arthritis. Clin Rheumatol. 2004;23:121-2.
[23] Bonilla E, Francis L, Allam F, Ogrinc M, Neupane H, Phillips PE, et al. Immunofluorescence microscopy is superior to fluorescent beads for detection of antinuclear antibody reactivity in systemic lupus erythematosus patients. Clin Immunol. 2007;124:18-21.
[24] Haga HJ, Andersen DT, Peen E. Prevalence of IgA class antibodies to cyclic citrullinated peptide (anti-CCP) in patients with primary Sjogren's syndrome, and its association to clinical manifestations. Clin Rheumatol. 2011;30:369-72.
[25] Ciccarelli O, Bagnato F, Mainero C, Salvetti M, Paolillo A, Gasperini C, et al. Antinuclear antibodies and response to IFNbeta-1a therapy in relapsing-remitting multiple sclerosis. Mult Scler. 2000;6:137-9.
[26] Renaudineau Y, Dalekos GN, Gueguen P, Zachou K, Youinou P. Anti-alpha-actinin antibodies cross-react with anti-ssDNA antibodies in active autoimmune hepatitis. Clin Rev Allergy Immunol. 2008;34:321-5.
[27] Vasiliauskiene L, Wiik A, Hoier-Madsen M. Prevalence and clinical significance of antikeratin antibodies and other serological markers in Lithuanian patients with rheumatoid arthritis. Ann Rheum Dis. 2001;60:459-66.
[28] Salonen EM, Miettinen A, Walle TK, Koskenmies S, Kere J, Julkunen H. Anti-telomere antibodies in systemic lupus erythematosus (SLE): a comparison with five antinuclear antibody assays in 430 patients with SLE and other rheumatic diseases. Ann Rheum Dis. 2004;63:1250-4.
[29] Peen E, Mellbye OJ, Haga HJ. IgA rheumatoid factor in primary Sjogren's syndrome. Scand J Rheumatol. 2009;38:46-9.
[30] Antiguedad A, Ruiz J, Mendibe MM, Zarranz JJ. [Antinuclear antibodies in multiple sclerosis]. Neurologia. 1997;12:245-8.
[31] Hoffman IE, Peene I, Meheus L, Huizinga TW, Cebecauer L, Isenberg D, et al. Specific antinuclear antibodies are associated with clinical features in systemic lupus erythematosus. Ann Rheum Dis. 2004;63:1155-8.
[32] Mandl T, Bredberg A, Jacobsson LT, Manthorpe R, Henriksson G. CD4+ T-lymphocytopenia--a frequent finding in anti-SSA antibody seropositive patients with primary Sjogren's syndrome. J Rheumatol. 2004;31:726-8.
[33] Aisen ML, Aisen PS. Antinuclear antibodies in multiple sclerosis. Neurology. 1995;45:2299-300;author reply 300-1.
[34] Nishimura S, Nishiya K, Hisakawa N, Chikazawa H, Ookubo S, Nakatani K, et al. Positivity for antinuclear antibody in patients with advanced rheumatoid arthritis. Acta Medica Okayama. 1996;50:261-5.
[35] Arbuckle MR, James JA, Kohlhase KF, Rubertone MV, Dennis GJ, Harley JB. Development of anti-dsDNA autoantibodies prior to clinical diagnosis of systemic lupus erythematosus. Scand J Immunol. 2001;54:211-9.
[36] Ruffatti A, Ostuni P, Grypiotis P, Botsios C, Tonello M, Grava C, et al. Sensitivity and specificity for primary Sjogren's syndrome of IgA and IgG anti-alpha-fodrin antibodies detected by ELISA. J Rheumatol. 2004;31:504-7.
[37] Heinzlef O, Johannet C, Tournier-Lasserve E, Roullet E. Antinuclear antibodies in multiple sclerosis. Neurology. 1995;45:2299-300; author reply 300-1.
[38] Papadopoulos NG, Tsiaousis GZ, Pavlitou-Tsiontsi A, Giannakou A, Galanopoulou VK. Does the presence of anti-CCP autoantibodies and their serum levels influence the severity and activity in rheumatoid arthritis patients? Clin Rev Allergy Immunol. 2008;34:11-5.
[39] Abuaf N, Laperche S, Carsique R, Meyer O, Deschamps A, Rajoely B, et al. Antimitochondrial antibodies in the antiphospholipid syndrome. Clin Rev Allergy Immunol. 1995;13:57-65.
[40] Hida A, Kawabe Y, Kawakami A, Migita K, Tominaga M, Nakamura H, et al. HTLV-I associated Sjogren's syndrome is aetiologically distinct from anti-centromere antibodies positive Sjogren's syndrome. Ann Rheum Dis. 1999;58:320-2.
[41] Furtado RN, Pucinelli ML, Cristo VV, Andrade LE, Sato EI. Scleroderma-like nailfold capillaroscopic abnormalities are associated with anti-U1-RNP antibodies and Raynaud's phenomenon in SLE patients. Lupus. 2002;11:35-41.
[42] Hebbar M, Lassalle P, Delneste Y, Hatron PY, Devulder B, Tonnel AB, et al. Assessment of anti-endothelial cell antibodies in systemic sclerosis and Sjogren's syndrome. Ann Rheum Dis. 1997;56:230-4.
[43] Cordoliani MA, Michon-Pasturel U, Rerat K, Arvieux J, Masy E, Hachulla E, et al. [Multiple sclerosis and antiphospholipid antibodies: study of 62 consecutive patients]. Rev Med Interne. 1998;19:635-9.
[44] Czaja AJ, Morshed SA, Parveen S, Nishioka M. Antibodies to single-stranded and double-stranded DNA in antinuclear antibody-positive type 1-autoimmune hepatitis. Hepatology. 1997;26:567-72.
[45] Cervera R, Vinas O, Ramos-Casals M, Font J, Garcia-Carrasco M, Siso A, et al. Anti-chromatin antibodies in systemic lupus erythematosus: a useful marker for lupus nephropathy. Ann Rheum Dis. 2003;62:431-4.
[46] Bardin N, Desplat-Jego S, Daniel L, Jourde Chiche N, Sanmarco M. BioPlex 2200 multiplexed system: simultaneous detection of anti-dsDNA and anti-chromatin antibodies in patients with systemic lupus erythematosus. Autoimmunity. 2009;42:63-8.
[47] Renaudineau Y, Croquefer S, Jousse S, Renaudineau E, Devauchelle V, Gueguen P, et al. Association of alpha-actinin-binding anti-double-stranded DNA antibodies with lupus nephritis. Arthritis Rheum. 2006;54:2523-32.
[48] Prasad R, Ibanez D, Gladman D, Urowitz M. Anti-dsDNA and anti-Sm antibodies do not predict damage in systemic lupus erythematosus. Lupus. 2006;15:285-91.
[49] Forger F, Matthias T, Oppermann M, Becker H, Helmke K. Clinical significance of anti-dsDNA antibody isotypes: IgG/IgM ratio of anti-dsDNA antibodies as a prognostic marker for lupus nephritis. Lupus. 2004;13:36-44.
[50] Villalta D, Romelli PB, Savina C, Bizzaro N, Tozzoli R, Tonutti E, et al. Anti-dsDNA antibody avidity determination by a simple reliable ELISA method for SLE diagnosis and monitoring. Lupus. 2003;12:31-6.
[51] Abu-Shakra M, Krup M, Slor H, Shoenfeld Y. Anti-Sm-RNP activity in sera of patients with rheumatic and autoimmune diseases. Clin Rheumatol. 1990;9:346-55.
[52] Lopez-Longo FJ, Monteagudo I, Gonzalez CM, Grau R, Carreno L. Systemic lupus erythematosus: clinical expression and anti-Ro/SS--a response in patients with and without lesions of subacute cutaneous lupus erythematosus. Lupus. 1997;6:32-9.
[53] Ramos-Casals M, Nardi N, Brito-Zeron P, Aguilo S, Gil V, Delgado G, et al. Atypical autoantibodies in patients with primary Sjogren syndrome: clinical characteristics and follow-up of 82 cases. Semin Arthritis Rheum. 2006;35:312-21.
[54] Sanchez-Guerrero J, Lew RA, Fossel AH, Schur PH. Utility of anti-Sm, anti-RNP, anti-Ro/SS-A, and anti-La/SS-B (extractable nuclear antigens) detected by enzyme-linked immunosorbent assay for the diagnosis of systemic lupus erythematosus. Arthritis Rheum. 1996;39:1055-61.
[55] Nardi N, Brito-Zeron P, Ramos-Casals M, Aguilo S, Cervera R, Ingelmo M, et al. Circulating auto-antibodies against nuclear and non-nuclear antigens in primary Sjogren's syndrome: prevalence and clinical significance in 335 patients. Clin Rheumatol. 2006;25:341-6.
[56] Mok CC, Ho LY, Leung HW, Wong LG. Performance of anti-C1q, antinucleosome, and anti-dsDNA antibodies for detecting concurrent disease activity of systemic lupus erythematosus. Transl Res. 2010;156:320-5.
[57] Lopez-Longo FJ, Gonzalez Fernandez CM, Rodriguez Mahou M, Grau Simo R, Monteagudo Saez I, Meno Garcia AC, et al. [Clinical expression of systemic lupus erythematosus with anti-U1-RNP and anti-Sm antibodies]. Rev Clin Esp. 1997;197:329-35.
[58] Montecucco C, Caporali R, Ravelli A, Ronchetti A, Rossi S, Martini A, et al. Frequency and clinical significance of anti-RNP antibodies in Italian SLE patients. Ann Ital Med Int. 1994;9:12-5.
[59] Nojima T, Kamata M, Matsunobu T, Kimura M, Mimori T, Matsumura M, et al. [Detection of autoantibodies in sera from patients with rheumatoid arthritis]. Ryumachi. 1994;34:871-8.
[60] Fukuda MV, Lo SC, de Almeida CS, Shinjo SK. Anti-Ro antibody and cutaneous vasculitis in systemic lupus erythematosus. Clin Rheumatol. 2009;28:301-4.
[61] Paz ML, Gonzalez Maglio DH, Pino M, Ferrari A, Weill FS, Nasswetter G, et al. Anti-ribonucleoproteins autoantibodies in patients with systemic autoimmune diseases. Relation with cutaneous photosensitivity. Clin Rheumatol. 2011;30:209-16.
[62] Parveen S, Morshed SA, Arima K, Nishioka M, Czaja AJ, Chow WC, et al. Antibodies to Ro/La, Cenp-B, and snRNPs antigens in autoimmune hepatitis of North America versus Asia: patterns of immunofluorescence, ELISA reactivities, and HLA association. Dig Dis Sci. 1998;43:1322-31.
[63] Burbelo PD, Leahy HP, Issa AT, Groot S, Baraniuk JN, Nikolov NP, et al. Sensitive and robust luminescent profiling of anti-La and other autoantibodies in Sjogren's syndrome. Autoimmunity. 2009;42:515-24.
[64] van Noord C, Hooijkaas H, Dufour-van den Goorbergh BC, van Hagen PM, van Daele PL, van de Merwe JP. Diagnostic value of anti-cyclic citrullinated peptide antibodies to detect rheumatoid arthritis in patients with Sjogren's syndrome. Ann Rheum Dis. 2005;64:160-2.
[65] Gottenberg JE, Mignot S, Nicaise-Rolland P, Cohen-Solal J, Aucouturier F, Goetz J, et al. Prevalence of anti-cyclic citrullinated peptide and anti-keratin antibodies in patients with primary Sjogren's syndrome. Ann Rheum Dis. 2005;64:114-7.
[66] Locht H, Pelck R, Manthorpe R. Diagnostic and prognostic significance of measuring antibodies to alpha-fodrin compared to anti-Ro-52, anti-Ro-60, and anti-La in primary Sjogren's syndrome. J Rheumatol. 2008;35:845-9.
[67] Ruiz-Tiscar JL, Lopez-Longo FJ, Sanchez-Ramon S, Santamaria B, Urrea R, Carreno L, et al. Prevalence of IgG anti-{alpha}-fodrin antibodies in Sjogren's syndrome. Ann N Y Acad Sci. 2005;1050:210-6.
[68] Nakken B, Jonsson R, Bolstad AI. Polymorphisms of the Ro52 gene associated with anti-Ro 52-kd autoantibodies in patients with primary Sjogren's syndrome. Arthritis Rheum. 2001;44:638-46.
[69] Tzioufas AG, Boumba DS, Skopouli FN, Moutsopoulos HM. Mixed monoclonal cryoglobulinemia and monoclonal rheumatoid factor cross-reactive idiotypes as predictive factors for the development of lymphoma in primary Sjogren's syndrome. Arthritis Rheum. 1996;39:767-72.
[70] Montano-Loza AJ, Shums Z, Norman GL, Czaja AJ. Prognostic implications of antibodies to Ro/SSA and soluble liver antigen in type 1 autoimmune hepatitis. Liver Int. 2012;32:85-92.
[71] Boire G, Menard HA, Gendron M, Lussier A, Myhal D. Rheumatoid arthritis: anti-Ro antibodies define a non-HLA-DR4 associated clinicoserological cluster. J Rheumatol. 1993;20:1654-60.
[72] Palomo I, Pinochet C, Alarcon M, Sandoval R, Gonzalez J, Monsalves F, et al. Prevalence of antiphospholipid antibodies in Chilean patients with rheumatoid arthritis. J Clin Lab Anal. 2006;20:190-4.
[73] Calvo-Alen J, Toloza SM, Fernandez M, Bastian HM, Fessler BJ, Roseman JM, et al. Systemic lupus erythematosus in a multiethnic US cohort (LUMINA). XXV. Smoking, older age, disease activity, lupus anticoagulant, and glucocorticoid dose as risk factors for the occurrence of venous thrombosis in lupus patients. Arthritis Rheum. 2005;52:2060-8.
[74] Lee SS, Cho ML, Joo YS, Kim WU, Hong YS, Min JK, et al. Isotypes of anti-beta2-glycoprotein I antibodies: association with thrombosis in patients with systemic lupus erythematosus. J Rheumatol. 2001;28:520-4.
[75] Nojima J, Suehisa E, Kuratsune H, Machii T, Koike T, Kitani T, et al. Platelet activation induced by combined effects of anticardiolipin and lupus anticoagulant IgG antibodies in patients with systemic lupus erythematosus--possible association with thrombotic and thrombocytopenic complications. Thromb Haemost. 1999;81:436-41.
[76] Nojima J, Suehisa E, Kuratsune H, Machii T, Toku M, Tada H, et al. High prevalence of thrombocytopenia in SLE patients with a high level of anticardiolipin antibodies combined with lupus anticoagulant. Am J Hematol. 1998;58:55-60.
[77] Nojima J, Suehisa E, Akita N, Toku M, Fushimi R, Tada H, et al. Risk of arterial thrombosis in patients with anticardiolipin antibodies and lupus anticoagulant. Br J Haematol. 1997;96:447-50.
[78] Jouhikainen T, Julkunen H, Vaarala O, Leirisalo-Repo M, Stephansson E, Vahtera E, et al. Antiphospholipid antibodies and thrombosis in systemic lupus erythematosus: comparison of three lupus anticoagulant assays and anticardiolipin ELISA in 188 patients. Blood Coagul Fibrinolysis. 1992;3:407-14.
[79] Ninomiya C, Taniguchi O, Kato T, Hirano T, Hashimoto H, Hirose S. Distribution and clinical significance of lupus anticoagulant and anticardiolipin antibody in 349 patients with systemic lupus erythematosus. Intern Med. 1992;31:194-9.
[80] Visvanathan S, Wagner C, Smolen J, St Clair EW, Hegedus R, Baker D, et al. IgG and IgM anticardiolipin antibodies following treatment with infliximab plus methotrexate in patients with early rheumatoid arthritis. Arthritis Rheum. 2006;54:2840-4.
[81] Mehrani T, Petri M. Association of IgA Anti-beta2 glycoprotein I with clinical and laboratory manifestations of systemic lupus erythematosus. J Rheumatol. 2011;38:64-8.
[82] Heinzlef O, Weill B, Johanet C, Sazdovitch V, Caillat-Zucman S, Tournier-Lasserve E, et al. Anticardiolipin antibodies in patients with multiple sclerosis do not represent a subgroup of patients according to clinical, familial, and biological characteristics. J Neurol Neurosurg Psychiatry. 2002;72:647-9.
[83] Sastre-Garriga J, Reverter JC, Font J, Tintore M, Espinosa G, Montalban X. Anticardiolipin antibodies are not a useful screening tool in a nonselected large group of patients with multiple sclerosis. Ann Neurol. 2001;49:408-11.
[84] Liaskos C, Rigopoulou E, Zachou K, Georgiadou S, Gatselis N, Papamihali R, et al. Prevalence and clinical significance of anticardiolipin antibodies in patients with type 1 autoimmune hepatitis. J Autoimmun. 2005;24:251-60.
[85] Abaci A, Bober E, Yesilkaya E, Bideci A, Cinaz P, Buyukgebiz A. Prevalence of anticardiolipin antibodies in type 1 diabetes and autoimmune thyroiditis. Pol Arch Med Wewn. 2010;120:71-5.
[86] Damoiseaux J, Peeters L, Hupperts R, Boreas A, ten Cate H, Tervaert JW. Prevalence of anticardiolipin antibodies in patient cohorts with distinct clinical manifestations of the antiphospholipid syndrome. Ann N Y Acad Sci. 2009;1173:146-51.
[87] Sherer Y, Gerli R, Vaudo G, Schillaci G, Gilburd B, Giordano A, et al. Prevalence of antiphospholipid and antioxidized low-density lipoprotein antibodies in rheumatoid arthritis. Ann N Y Acad Sci. 2005;1051:299-303.
[88] Tubach F, Hayem G, Marchand JL, Weber M, Palazzo E, de Bandt M, et al. IgG anti-beta2-glycoprotein I antibodies in adult patients with systemic lupus erythematosus: prevalence and diagnostic value for the antiphospholipid syndrome. J Rheumatol. 2000;27:1437-43.
[89] Cucurull E, Gharavi AE, Diri E, Mendez E, Kapoor D, Espinoza LR. IgA anticardiolipin and anti-beta2-glycoprotein I are the most prevalent isotypes in African American patients with systemic lupus erythematosus. Am J Med Sci. 1999;318:55-60.
[90] Mehrani T, Petri M. IgM anti-beta2 glycoprotein I is protective against lupus nephritis and renal damage in systemic lupus erythematosus. J Rheumatol. 2011;38:450-3.
[91] Horbach DA, van Oort E, Tempelman MJ, Derksen RH, de Groot PG. The prevalence of a non-phospholipid-binding form of beta2-glycoprotein I in human plasma--consequences for the development of anti-beta2-glycoprotein I antibodies. Thromb Haemost. 1998;80:791-7.
[92] Romero FI, Amengual O, Atsumi T, Khamashta MA, Tinahones FJ, Hughes GR. Arterial disease in lupus and secondary antiphospholipid syndrome: association with anti-beta2-glycoprotein I antibodies but not with antibodies against oxidized low-density lipoprotein. Br J Rheumatol. 1998;37:883-8.
[93] Vasilopoulos Y, Bagiatis V, Stamatopoulou D, Zisopoulos D, Alexiou I, Sarafidou T, et al. Association of anti-CCP positivity and carriage of TNFRII susceptibility variant with anti-TNF-alpha response in rheumatoid arthritis. Clin Exp Rheumatol. 2011;29:701-4.
[94] Hoffman IE, Peene I, Cebecauer L, Isenberg D, Huizinga TW, Union A, et al. Presence of rheumatoid factor and antibodies to citrullinated peptides in systemic lupus erythematosus. Ann Rheum Dis. 2005;64:330-2.
[95] Vannini A, Cheung K, Fusconi M, Stammen-Vogelzangs J, Drenth JP, Dall'Aglio AC, et al. Anti-cyclic citrullinated peptide positivity in non-rheumatoid arthritis disease samples: citrulline-dependent or not? Ann Rheum Dis. 2007;66:511-6.
[96] Gomez EL, Gun SC, Somnath SD, D'Souza B, Lim AL, Chinna K, et al. The prevalence of rheumatoid factor isotypes and anti-cyclic citrullinated peptides in Malaysian rheumatoid arthritis patients. Int J Rheum Dis. 2011;14:12-7.
[97] Qing YF, Zhang QB, Zhou JG, Yuan GH, Wei J, Xing Y, et al. The detecting and clinical value of anti-cyclic citrullinated peptide antibodies in patients with systemic lupus erythematosus. Lupus. 2009;18:713-7.
[98] Miriovsky BJ, Michaud K, Thiele GM, O'Dell JR, Cannon GW, Kerr G, et al. Anti-CCP antibody and rheumatoid factor concentrations predict greater disease activity in men with rheumatoid arthritis. Ann Rheum Dis. 2010;69:1292-7.
[99] Heidari B, Firouzjahi A, Heidari P, Hajian K. The prevalence and diagnostic performance of anti-cyclic citrullinated peptide antibody in rheumatoid arthritis: the predictive and discriminative ability of serum antibody level in recognizing rheumatoid arthritis. Ann Saudi Med. 2009;29:467-70.
[100] Liao J, Ip WS, Cheung KY, Wan WM, Cautherley GW, Cai X, et al. Diagnostic utility of an anti-CCP point-of-care immunotest in Chinese patients with rheumatoid arthritis. Clin Chim Acta. 2011;412:778-81.
[101] Silveira IG, Burlingame RW, von Muhlen CA, Bender AL, Staub HL. Anti-CCP antibodies have more diagnostic impact than rheumatoid factor (RF) in a population tested for RF. Clin Rheumatol. 2007;26:1883-9.
[102] Korkmaz C, Us T, Kasifoglu T, Akgun Y. Anti-cyclic citrullinated peptide (CCP) antibodies in patients with long-standing rheumatoid arthritis and their relationship with extra-articular manifestations. Clin Biochem. 2006;39:961-5.
[103] Gupta B, Raghav SK, Agrawal C, Chaturvedi VP, Das RH, Das HR. Anti-MBL autoantibodies in patients with rheumatoid arthritis: prevalence and clinical significance. J Autoimmun. 2006;27:125-33.
[104] Inanc N, Dalkilic E, Kamali S, Kasapoglu-Gunal E, Elbir Y, Direskeneli H, et al. Anti-CCP antibodies in rheumatoid arthritis and psoriatic arthritis. Clin Rheumatol. 2007;26:17-23.
[105] Quinn MA, Gough AK, Green MJ, Devlin J, Hensor EM, Greenstein A, et al. Anti-CCP antibodies measured at disease onset help identify seronegative rheumatoid arthritis and predict radiological and functional outcome. Rheumatology (Oxford). 2006;45:478-80.
[106] Linn-Rasker SP, van der Helm-van Mil AH, van Gaalen FA, Kloppenburg M, de Vries RR, le Cessie S, et al. Smoking is a risk factor for anti-CCP antibodies only in rheumatoid arthritis patients who carry HLA-DRB1 shared epitope alleles. Ann Rheum Dis. 2006;65:366-71.
[107] Sauerland U, Becker H, Seidel M, Schotte H, Willeke P, Schorat A, et al. Clinical utility of the anti-CCP assay: experiences with 700 patients. Ann N Y Acad Sci. 2005;1050:314-8.
[108] Forslind K, Ahlmen M, Eberhardt K, Hafstrom I, Svensson B. Prediction of radiological outcome in early rheumatoid arthritis in clinical practice: role of antibodies to citrullinated peptides (anti-CCP). Ann Rheum Dis. 2004;63:1090-5.
[109] Kastbom A, Strandberg G, Lindroos A, Skogh T. Anti-CCP antibody test predicts the disease course during 3 years in early rheumatoid arthritis (the Swedish TIRA project). Ann Rheum Dis. 2004;63:1085-9.
[110] Lee DM, Schur PH. Clinical utility of the anti-CCP assay in patients with rheumatic diseases. Ann Rheum Dis. 2003;62:870-4.
[111] Hakala M, Sajanti E, Ikaheimo I, Aho K. High prevalence of rheumatoid factor in community-based series of patients with rheumatoid arthritis meeting the new (1987) ARA criteria: RF-negative non-erosive rheumatoid arthritis is very rare. Scand J Rheumatol. 1998;27:368-72.
[112] Hodkinson B, Meyer PW, Musenge E, Ally MM, Wadee AA, Anderson R, et al. The diagnostic utility of the anti-CCP antibody test is no better than rheumatoid factor in South Africans with early rheumatoid arthritis. Clin Rheumatol. 2010;29:615-8.
[113] Desplat-Jego S, Deharveng I, Baronne R, Valero R, Begu-Le Corroller A, Vialettes B. Antibodies to cyclic citrullinated peptides (anti-CCP) in Type 1 diabetes mellitus. Diabet Med. 2010;27:725-7.
[114] Chan MT, Owen P, Dunphy J, Cox B, Carmichael C, Korendowych E, et al. Associations of erosive arthritis with anti-cyclic citrullinated peptide antibodies and MHC Class II alleles in systemic lupus erythematosus. J Rheumatol. 2008;35:77-83.
[115] Fusconi M, Vannini A, Dall'Aglio AC, Pappas G, Cassani F, Ballardini G, et al. Anti-cyclic citrullinated peptide antibodies in type 1 autoimmune hepatitis. Aliment Pharmacol Ther. 2005;22:951-5.
[116] Bronson PG, Ramsay PP, Seldin MF, Gregersen PK, Criswell LA, Barcellos LF. A candidate gene study of CLEC16A does not provide evidence of association with risk for anti-CCP-positive rheumatoid arthritis. Genes Immun. 2010;11:504-8.
[117] Kakumanu P, Sobel ES, Narain S, Li Y, Akaogi J, Yamasaki Y, et al. Citrulline dependence of anti-cyclic citrullinated peptide antibodies in systemic lupus erythematosus as a marker of deforming/erosive arthritis. J Rheumatol. 2009;36:2682-90.
[118] Zhao J, Liu X, Wang Z, Li Z. Significance of anti-CCP antibodies in modification of 1987 ACR classification criteria in diagnosis of rheumatoid arthritis. Clin Rheumatol. 2010;29:33-8.
[119] Zhao Y, Li J, Li XX, Li C, Li L, Li ZG. What can we learn from the presence of anti-cyclic citrullinated peptide antibodies in systemic lupus erythematosus? Joint Bone Spine. 2009;76:501-7.
[120] Pratesi F, Tommasi C, Anzilotti C, Puxeddu I, Sardano E, Di Colo G, et al. Antibodies to a new viral citrullinated peptide, VCP2: fine specificity and correlation with anti-cyclic citrullinated peptide (CCP) and anti-VCP1 antibodies. Clin Exp Immunol. 2011;164:337-45.
[121] Herold M, Boeser V, Russe E, Klotz W. Anti-CCP: history and its usefulness. Clinical and Developmental Immunology. 2005;12:131-5.
[122] da Silva ME, Porta G, Goldberg AC, Bittencourt PL, Fukui RT, Correia MR, et al. Diabetes mellitus-related autoantibodies in childhood autoimmune hepatitis. Journal of Pediatric Endocrinology and Metabolism. 2002;15:831-40.
[123] Tridgell DM, Spiekerman C, Wang RS, Greenbaum CJ. Interaction of onset and duration of diabetes on the percent of GAD and IA-2 antibody-positive subjects in the type 1 diabetes genetics consortium database. Diabetes Care. 2011;34:988-93.
[124] Lampasona V, Petrone A, Tiberti C, Capizzi M, Spoletini M, di Pietro S, et al. Zinc transporter 8 antibodies complement GAD and IA-2 antibodies in the identification and characterization of adult-onset autoimmune diabetes: Non Insulin Requiring Autoimmune Diabetes (NIRAD) 4. Diabetes Care. 2010;33:104-8.
[125] Ota T, Takamura T, Nagai Y, Bando Y, Usuda R. Significance of IA-2 antibody in Japanese type 1 diabetes: its association with GAD antibody. Diabetes Res Clin Pract. 2005;67:63-9.
[126] Barova H, Perusicova J, Hill M, Sterzl I, Vondra K, Masek Z. Anti-GAD-positive patients with type 1 diabetes mellitus have higher prevalence of autoimmune thyroiditis than anti-GAD-negative patients with type 1 and type 2 diabetes mellitus. Physiol Res. 2004;53:279-86.
[127] Battelino T, Ursic-Bratina N, Dolzan V, Stopar-Obreza M, Pozzilli P, Krzisnik C, et al. The HLA-DRB, -DQB polymorphism and anti-insulin antibody response in Slovenian patients with type 1 diabetes. Eur J Immunogenet. 2003;30:223-7.
[128] Elkadhi A, Khelifi N, Abid A, Nagati K, Jenhani F, Ben Rayana MC. [Prevalence of anti-GAD autoantibodies in Tunisian children with type 1 diabetes]. Tunis Med. 2002;80:281-5.
[129] Tandon N, Shtauvere-Brameus A, Hagopian WA, Sanjeevi CB. Prevalence of ICA-12 and other autoantibodies in north Indian patients with early-onset diabetes. Ann N Y Acad Sci. 2002;958:214-7.
[130] Lohmann T, Kellner K, Verlohren HJ, Krug J, Steindorf J, Scherbaum WA, et al. Titre and combination of ICA and autoantibodies to glutamic acid decarboxylase discriminate two clinically distinct types of latent autoimmune diabetes in adults (LADA). Diabetologia. 2001;44:1005-10.
[131] Torn C, Landin-Olsson M, Ostman J, Schersten B, Arnqvist H, Blohme G, et al. Glutamic acid decarboxylase antibodies (GADA) is the most important factor for prediction of insulin therapy within 3 years in young adult diabetic patients not classified as Type 1 diabetes on clinical grounds. Diabetes Metab Res Rev. 2000;16:442-47.
[132] Ohta M, Ohta K, Obayashi H, Nakamura N, Shigeta H, Nakano K, et al. Clinical evaluation of a radioimmunoprecipitation assay for IA-2 antibody and comparison of GAD antibody in type 1 diabetes mellitus. Autoimmunity. 2000;32:79-88.
[133] Nakamoto S, Kasuga A, Maruyama T, Ozawa Y, Amemiya S, Saruta T. Age of onset, not type of onset, affects the positivity and evanescence of IA-2 antibody. Diabetes Res Clin Pract. 2000;50:147-52.
[134] Maugendre D, Sonnet E, Derrien C, Le Golff MC, Grais MC, Allannic H, et al. Combined analysis of long-term anti-beta-cell humoral reactivity in type 1 diabetes with and without thyroid disease. Diabetes Metab. 1999;25:28-33.
[135] Maclaren N, Lan M, Coutant R, Schatz D, Silverstein J, Muir A, et al. Only multiple autoantibodies to islet cells (ICA), insulin, GAD65, IA-2 and IA-2beta predict immune-mediated (Type 1) diabetes in relatives. J Autoimmun. 1999;12:279-87.
[136] Thai AC, Ng WY, Loke KY, Lee WR, Lui KF, Cheah JS. Anti-GAD antibodies in Chinese patients with youth and adult-onset IDDM and NIDDM. Diabetologia. 1997;40:1425-30.
[137] Ohta M, Obayashi H, Takahashi K, Kitagawa Y, Nakano K, Matsuo S, et al. Radioimmunoprecipitation assay for glutamic acid decarboxylase antibodies evaluated clinically with sera from patients with insulin-dependent diabetes mellitus. Clin Chem. 1996;42:1975-8.
[138] Sabbah E, Kulmala P, Veijola R, Vahasalo P, Karjalainen J, Tuomilehto-Wolf E, et al. Glutamic acid decarboxylase antibodies in relation to other autoantibodies and genetic risk markers in children with newly diagnosed insulin-dependent diabetes. Childhood Diabetes in Finland Study Group. J Clin Endocrinol Metab. 1996;81:2455-9.
[139] Sugihara S, Konda S, Wataki K, Kobayashi Y, Murata A, Miyamoto S, et al. Clinical significance and time course of antibodies to glutamic acid decarboxylase in Japanese children with type I (insulin-dependent) diabetes mellitus. Acta Paediatr. 1996;85:558-63.
[140] Abrams P, De Leeuw I, Vertommen J. In new-onset insulin-dependent diabetic patients the presence of anti-thyroid peroxidase antibodies is associated with islet cell autoimmunity and the high risk haplotype HLA DQA1*0301-DQB1*0302. Belgian Diabetes Registry. Diabet Med. 1996;13:415-9.
[141] Hagopian WA, Sanjeevi CB, Kockum I, Landin-Olsson M, Karlsen AE, Sundkvist G, et al. Glutamate decarboxylase-, insulin-, and islet cell-antibodies and HLA typing to detect diabetes in a general population-based study of Swedish children. J Clin Invest. 1995;95:1505-11.
[142] Kawasaki E, Takino H, Yano M, Uotani S, Matsumoto K, Yamaguchi Y, et al. Evaluation of islet-specific autoantibodies in Japanese patients with insulin-dependent diabetes mellitus: a comparison between autoantibodies to glutamic acid decarboxylase, autoantibodies to 64 kDa islet cell protein and islet cell antibodies. J Autoimmun. 1994;7:791-802.
[143] Akawaza S, Kawasaki E, Yano M, Abiru N, Yamaguchi Y, Nagataki S. Autoantibodies to glutamic acid decarboxylase (GAD), 64,000-Mr islet cell protein (64K) antibodies and islet cell antibodies (ICA) in insulin-dependent diabetes mellitus with and without autoimmune diseases in Japan. Diabetes Res Clin Pract. 1994;24 Suppl:S89-93.
[144] Chen QY, Rowley MJ, Byrne GC, Jones TW, Tuomi T, Knowles WJ, et al. Antibodies to glutamic acid decarboxylase in Australian children with insulin-dependent diabetes mellitus and their first-degree relatives. Pediatr Res. 1993;34:785-90.
[145] Tuomi T, Zimmet PZ, Rowley MJ, Serjeantson SW, Mackay IR. Persisting antibodies to glutamic acid decarboxylase in type 1 (insulin-dependent) diabetes mellitus are not associated with neuropathy. Diabetologia. 1993;36:685.
[146] Merchant PC, Godse CS, Varthakavi PK, Patel KL, Nihalani KD. Prevalence of islet cell antibodies and B cell functional status in insulin dependent diabetes. J Assoc Physicians India. 1996;44:457-60.
[147] Kida K, Mimura G, Kobayashi T, Matsuura N, Toyota T, Kitagawa T, et al. ICA and organ-specific autoantibodies among Japanese patients with early-onset insulin-dependent diabetes mellitus--the JDS study. Diabetes Res Clin Pract. 1994;23:187-93.
[148] Williams AJ, Curnock R, Reed CR, Easton P, Rokni S, Bingley PJ. Anti-BSA antibodies are a major cause of non-specific binding in insulin autoantibody radiobinding assays. J Immunol Methods. 2010;362:199-203.
[149] Semakula C, Vandewalle CL, Van Schravendijk CF, Sodoyez JC, Schuit FC, Foriers A, et al. Abnormal circulating pancreatic enzyme activities in more than twenty-five percent of recent-onset insulin-dependent diabetic patients: association of hyperlipasemia with high-titer islet cell antibodies. Belgian Diabetes Registry. Pancreas. 1996;12:321-33.
[150] Salardi S, Cacciari E, Steri L, Donati S, Mandini M, Gualandi S, et al. An 8-year follow-up of anti-insulin antibodies in diabetic children: relation to insulin autoantibodies, HLA type, beta-cell function, clinical course and type of insulin therapy. Acta Paediatr. 1995;84:639-45.
[151] Efe C, Purnak T, Ozaslan E, Ozbalkan Z, Karaaslan Y, Altiparmak E, et al. Autoimmune liver disease in patients with systemic lupus erythematosus: a retrospective analysis of 147 cases. Scand J Gastroenterol. 2011;46:732-7.
[152] Muratori P, Muratori L, Agostinelli D, Pappas G, Veronesi L, Granito A, et al. Smooth muscle antibodies and type 1 autoimmune hepatitis. Autoimmunity. 2002;35:497-500.
[153] Gueguen P, Dalekos G, Nousbaum JB, Zachou K, Putterman C, Youinou P, et al. Double reactivity against actin and alpha-actinin defines a severe form of autoimmune hepatitis type 1. J Clin Immunol. 2006;26:495-505.
[154] Atzeni F, Doria A, Ghirardello A, Turiel M, Batticciotto A, Carrabba M, et al. Anti-thyroid antibodies and thyroid dysfunction in rheumatoid arthritis: prevalence and clinical value. Autoimmunity. 2008;41:111-5.
[155] Antonelli A, Fallahi P, Mosca M, Ferrari SM, Ruffilli I, Corti A, et al. Prevalence of thyroid dysfunctions in systemic lupus erythematosus. Metabolism. 2010;59:896-900.
[156] Annunziata P, Lore F, Venturini E, Morana P, Guarino E, Borghi S, et al. Early synthesis and correlation of serum anti-thyroid antibodies with clinical parameters in multiple sclerosis. J Neurol Sci. 1999;168:32-6.
[157] Sharifi F, Ghasemi L, Mousavinasab N. Thyroid function and anti-thyroid antibodies in Iranian patients with type 1 diabetes mellitus: influences of age and sex. Iran J Allergy Asthma Immunol. 2008;7:31-6.
[158] Przygodzka M, Filipowicz-Sosnowska A. Prevalence of thyroid diseases and antithyroid antibodies in women with rheumatoid arthritis. Pol Arch Med Wewn. 2009;119:39-43.
[159] Viggiano DP, da Silva NA, Montandon AC, Barbosa Vde S. [Prevalence of thyroid autoimmune disease in patients with systemic lupus erythematosus]. Arq Bras Endocrinol Metabol. 2008;52:531-6.
[160] Tunc R, Gonen MS, Acbay O, Hamuryudan V, Yazici H. Autoimmune thyroiditis and anti-thyroid antibodies in primary Sjogren's syndrome: a case-control study. Ann Rheum Dis. 2004;63:575-7.
[161] Appenzeller S, Pallone AT, Natalin RA, Costallat LT. Prevalence of thyroid dysfunction in systemic lupus erythematosus. J Clin Rheumatol. 2009;15:117-9.
[162] Maugendre D, Guilhem I, Karacatsanis C, Poirier JY, Leguerrier AM, Lorcy Y, et al. [Anti-TPO antibodies and screening of thyroid dysfunction in type 1 diabetic patients]. Ann Endocrinol (Paris). 2000;61:524-30.
[163] Durelli L, Oggero A, Verdun E, Isoardo GL, Barbero P, Bergamasco B, et al. Thyroid function and anti-thyroid antibodies in MS patients screened for interferon treatment. A multicenter study. J Neurol Sci. 2001;193:17-22.
[164] Andonopoulos AP, Siambi V, Makri M, Christofidou M, Markou C, Vagenakis AG. Thyroid function and immune profile in rheumatoid arthritis. A controlled study. Clin Rheumatol. 1996;15:599-603.
